# Supplementary material for: Mitochondrial Ribosomal Protein MRPS15 Is a Component of Cytosolic Ribosomes and Regulates Translation in Stressed Cardiomyocytes
Source: MDPI journal article supplement (doi:10.3390/ijms25063250), 2024-03-13
Supplement: s1 [file s1]

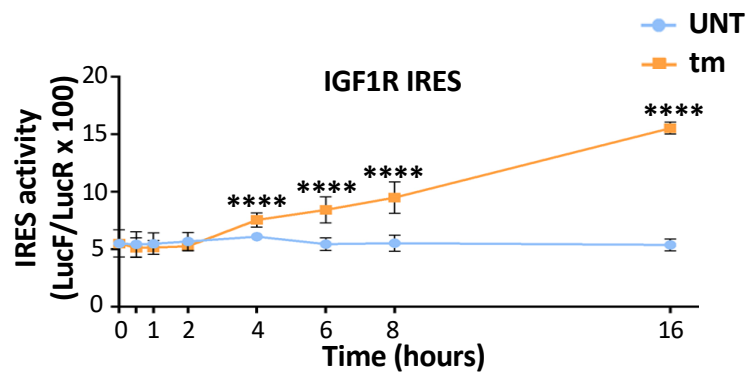

**Figure S1 : IGF1R IRES is activated after 4 hours of ER stress**

AC16 cardiomyocytes transduced by the bicistronic lentivector with the IGF1R IRES were submitted to tunicamycin treatment as in Figure 4. The IGF1R IRES activation time-course (0 hr, 30 min, 1 hr, 2 hr, 4 hr, 6 hr, 8 hr, 16 hr) was carried out by measuring Firefly/Renilla ratio. Experiments were performed three times with 3 biological replicates (n=9) and each time point was compared to 0 hr time point with a non parametric Mann-Whitney test (Table S7); \*\*\*\*p<0.0001.
