# Supplementary material for: Mitochondrial Ribosomal Protein MRPS15 Is a Component of Cytosolic Ribosomes and Regulates Translation in Stressed Cardiomyocytes
Source: MDPI journal article supplement (doi:10.3390/ijms25063250), 2024-03-13
Supplement: s1 [file s1]

**a. Cytosolic fraction, anti-MRPS15**

|               | Sample             | Experiment |            |           | Mean              | SD         |
|---------------|--------------------|------------|------------|-----------|-------------------|------------|
|               |                    | 1          | 2          | 3         |                   |            |
| <b>MRPS15</b> | Input unt          | 233986.1   | 1708121.8  | 370668.5  | <b>770925.7</b>   | 624797.6   |
|               | Input tm           | 334023.9   | 2268352.1  | 209904.1  | <b>937426.7</b>   | 887283.6   |
|               | Elution IgG unt    | 582755.7   | 4173010.1  | 799724.1  | <b>1851830</b>    | 1547453.4  |
|               | Elution IgG tm     | 447621.5   | 2862904.9  | 736728.4  | <b>1349084.9</b>  | 1009213.3  |
|               | Elution MRPS15 unt | 1214224.5  | 28026113.3 | 1450148.6 | <b>10230162.1</b> | 11863967.4 |
|               | Elution MRPS15 tm  | 1529598.8  | 8576962.6  | 1394634.5 | <b>3833732</b>    | 3162153.8  |

**b. Cytosolic fraction, anti-RPS2**

|             | Sample             | Experiment |            |            | Mean              | SD        |
|-------------|--------------------|------------|------------|------------|-------------------|-----------|
|             |                    | 1          | 2          | 3          |                   |           |
| <b>RPS2</b> | Input unt          | 654978.6   | 2754395.2  | 750156.3   | <b>1386510.03</b> | 911923.4  |
|             | Input tm           | 794446.1   | 4832281.2  | 3712050.5  | <b>3112925.93</b> | 1545653.2 |
|             | Elution IgG unt    | 2512238.7  | 10463478.1 | 11240391.1 | <b>8072035.97</b> | 3706531.5 |
|             | Elution IgG tm     | 1476950.6  | 11565894.4 | 9445851.9  | <b>7496232.3</b>  | 4012854.5 |
|             | Elution MRPS15 unt | 4962664.4  | 6553871.1  | 11553494.8 | <b>7690010.1</b>  | 2575656.5 |
|             | Elution MRPS15 tm  | 2866719.7  | 10571996.6 | 3586309.7  | <b>5675008.67</b> | 3264658.6 |

**c. Cytosolic fraction, anti-RPL10A**

|               | Sample             | Experiment |           |           | Mean             | SD       |
|---------------|--------------------|------------|-----------|-----------|------------------|----------|
|               |                    | 1          | 2         | 3         |                  |          |
| <b>RPL10A</b> | Input unt          | 54594.6    | 406247.6  | 55485.9   | <b>172109.4</b>  | 156092.2 |
|               | Input tm           | 47972.5    | 698432.8  | 264097.6  | <b>336834.3</b>  | 241065.7 |
|               | Elution IgG unt    | 760576.9   | 2874400   | 1795445.8 | <b>1810140.9</b> | 709506.1 |
|               | Elution IgG tm     | 1966437    | 1787059.9 | 1062709.8 | <b>1605402.2</b> | 361795   |
|               | Elution MRPS15 unt | 561725     | 2221278   | 1732357.3 | <b>1505120.1</b> | 628930.1 |
|               | Elution MRPS15 tm  | 474567.9   | 1452610.8 | 981694.2  | <b>969624.3</b>  | 330037.6 |

**Table S5. Co-immunoprecipitation of ribosomal proteins with MRPS15.**

a-c) MRPS15 immunoprecipitation experiment was performed using cytosolic extracts of unstressed or stressed cells without mitochondria. MRPS15 immunoprecipitation and RP co-immunoprecipitation were analyzed using capillary electrophoresis. Experiments were performed 5 times (Fig. 3d), and representative experiments are shown.
