# Supplementary material for: Mitochondrial Ribosomal Protein MRPS15 Is a Component of Cytosolic Ribosomes and Regulates Translation in Stressed Cardiomyocytes
Source: MDPI journal article supplement (doi:10.3390/ijms25063250), 2024-03-13
Supplement: s1 [file s1]

**a. LucF activity in untreated condition**

| <b>Firefly</b> | <b>Experiment</b> | <b>A</b> | <b>B</b> | <b>C</b> | <b>Mean</b> | <b>SD</b> | <b>Mean</b>     | <b>SD</b> |
|----------------|-------------------|----------|----------|----------|-------------|-----------|-----------------|-----------|
| <b>0 hr</b>    | 1                 | 330238.0 | 263198.0 | 315056.3 | 302830.8    | 35152.4   | <b>178692.1</b> | 94910.2   |
|                | 2                 | 121658.5 | 107024.5 | 118294.8 | 115659.3    | 7664.7    |                 |           |
|                | 3                 | 125927.2 | 116417.2 | 110414.8 | 117586.4    | 7822.0    |                 |           |
| <b>30 min</b>  | 1                 | 304498.0 | 306038.5 | 279580.7 | 296705.7    | 14850.7   | <b>181037.4</b> | 87354.3   |
|                | 2                 | 131076.2 | 114052.0 | 116870.8 | 120666.3    | 9124.7    |                 |           |
|                | 3                 | 129730.5 | 114529.0 | 132961.2 | 125740.2    | 9842.7    |                 |           |
| <b>1 hr</b>    | 1                 | 344261.5 | 329167.7 | 306828.3 | 326752.5    | 18833.1   | <b>193210.4</b> | 101585.6  |
|                | 2                 | 141598.0 | 133349.5 | 145837.5 | 140261.7    | 6350.3    |                 |           |
|                | 3                 | 124670.5 | 115309.5 | 97870.8  | 112616.9    | 13601.2   |                 |           |
| <b>2 hr</b>    | 1                 | 229780.3 | 265682.7 | 267559.7 | 254340.9    | 21290.8   | <b>170138.9</b> | 65604.2   |
|                | 2                 | 110719.2 | 135648.8 | 142098.2 | 129488.7    | 16571.7   |                 |           |
|                | 3                 | 153142.2 | 113520.5 | 113098.2 | 126586.9    | 22998.5   |                 |           |
| <b>4 hr</b>    | 1                 | 294175.7 | 281601.0 | 280903.7 | 285560.1    | 7469.4    | <b>195335.3</b> | 69340.9   |
|                | 2                 | 142235.5 | 159202.2 | 138444.8 | 146627.5    | 11053.7   |                 |           |
|                | 3                 | 162518.8 | 124111.5 | 174824.5 | 153818.3    | 26452.4   |                 |           |
| <b>6 hr</b>    | 1                 | 277832.7 | 299841.3 | 266673.3 | 281449.1    | 16877.1   | <b>168492.7</b> | 92419.5   |
|                | 2                 | 162985.0 | 152182.3 | 141060.0 | 152075.8    | 10962.9   |                 |           |
|                | 3                 | 86215.3  | 55599.3  | 74044.7  | 71953.1     | 15414.8   |                 |           |
| <b>8 hr</b>    | 1                 | 219066.0 | 204382.3 | 272146.3 | 231864.9    | 35649.0   | <b>170395.6</b> | 59504.9   |
|                | 2                 | 184948.3 | 168322.3 | 178111.7 | 177127.4    | 8356.6    |                 |           |
|                | 3                 | 104806.7 | 90652.3  | 111124.7 | 102194.6    | 10483.2   |                 |           |
| <b>16 hr</b>   | 1                 | 260388.0 | 226391.3 | 281572.3 | 256117.2    | 27837.3   | <b>168453.1</b> | 69403.1   |
|                | 2                 | 134752.7 | 149038.0 | 146006.0 | 143265.6    | 7526.6    |                 |           |
|                | 3                 | 94732.7  | 109014.0 | 114183.3 | 105976.7    | 10074.8   |                 |           |

**b. LucR activity in untreated condition**

| Renilla       | Experiment | A         | B         | C         | Mean      | SD       | Mean             | SD       |
|---------------|------------|-----------|-----------|-----------|-----------|----------|------------------|----------|
| <b>0 hr</b>   | 1          | 2344036.2 | 1988893.0 | 2333051.2 | 2221993.4 | 201945.6 | <b>1461994.1</b> | 583372.5 |
|               | 2          | 1195947.5 | 1080045.5 | 1191256.5 | 1155749.8 | 65603.8  |                  |          |
|               | 3          | 989012.7  | 1014182.5 | 1021522.0 | 1008239.1 | 17050.1  |                  |          |
| <b>30 min</b> | 1          | 2383044.5 | 2379841.5 | 2266075.5 | 2342987.2 | 66626.7  | <b>1565884.5</b> | 589103.9 |
|               | 2          | 1268536.2 | 1203962.5 | 1282526.2 | 1251674.9 | 41908.1  |                  |          |
|               | 3          | 1174022.3 | 1013948.5 | 1121003.7 | 1102991.5 | 81542.9  |                  |          |
| <b>1 hr</b>   | 1          | 2924972.0 | 2688764.5 | 2472769.8 | 2695502.1 | 226176.4 | <b>1791444.7</b> | 705166.3 |
|               | 2          | 1473335.0 | 1483665.8 | 1561197.8 | 1506066.2 | 48024.0  |                  |          |
|               | 3          | 1302851.0 | 1132168.7 | 1083277.3 | 1172765.7 | 115278.9 |                  |          |
| <b>2 hr</b>   | 1          | 1675576.5 | 2245379.5 | 2187790.2 | 2036248.7 | 313675.7 | <b>1596352.7</b> | 381756.3 |
|               | 2          | 1373672.8 | 1416414.5 | 1612169.2 | 1467418.8 | 127166.1 |                  |          |
|               | 3          | 1374993.7 | 1194531.7 | 1286646.3 | 1285390.6 | 90237.6  |                  |          |
| <b>4 hr</b>   | 1          | 2240171.2 | 2221184.2 | 2109661.2 | 2190338.8 | 70510.9  | <b>1704799.1</b> | 391799.4 |
|               | 2          | 1594790.2 | 1703006.5 | 1489903.8 | 1595900.2 | 106555.7 |                  |          |
|               | 3          | 1391574.7 | 1194049.7 | 1398850.7 | 1328158.3 | 116198.5 |                  |          |
| <b>6 hr</b>   | 1          | 2762725.0 | 2436528.0 | 2542065.3 | 2580439.4 | 166449.8 | <b>1636037.3</b> | 736625.6 |
|               | 2          | 1348099.7 | 1432835.7 | 1339500.0 | 1373478.4 | 51584.4  |                  |          |
|               | 3          | 911378.7  | 964951.3  | 986252.0  | 954194.0  | 38578.4  |                  |          |
| <b>8 hr</b>   | 1          | 2167235.3 | 2054268.3 | 2607660.7 | 2276388.1 | 292397.9 | <b>1700968.4</b> | 468418.5 |
|               | 2          | 1613224.0 | 1500470.3 | 1452239.3 | 1521977.9 | 82619.3  |                  |          |
|               | 3          | 1364787.0 | 1227868.3 | 1320962.3 | 1304539.2 | 69921.2  |                  |          |
| <b>16 hr</b>  | 1          | 2585393.3 | 2684587.7 | 2725132.7 | 2665037.9 | 71891.7  | <b>1699666.3</b> | 727031.5 |
|               | 2          | 1221696.3 | 1236322.3 | 1344485.0 | 1267501.2 | 67069.8  |                  |          |
|               | 3          | 1154650.3 | 1171656.0 | 1173073.3 | 1166459.9 | 10251.9  |                  |          |

c. LucF/ LucR ratio in untreated condition

| LucF/LucR | Experiment | A     | B     | C     | Mean  | SD    | Mean  | SD    | Mean (x100)   | SD    |
|-----------|------------|-------|-------|-------|-------|-------|-------|-------|---------------|-------|
| 0 hr      | 1          | 0.141 | 0.132 | 0.135 | 0.136 | 0.004 | 0.118 | 0.017 | <b>11.762</b> | 1.653 |
|           | 2          | 0.102 | 0.099 | 0.099 | 0.100 | 0.001 |       |       |               |       |
|           | 3          | 0.127 | 0.115 | 0.108 | 0.117 | 0.010 |       |       |               |       |
| 30 min    | 1          | 0.128 | 0.129 | 0.123 | 0.127 | 0.003 | 0.112 | 0.014 | <b>11.233</b> | 1.373 |
|           | 2          | 0.103 | 0.095 | 0.091 | 0.096 | 0.006 |       |       |               |       |
|           | 3          | 0.111 | 0.113 | 0.119 | 0.114 | 0.004 |       |       |               |       |
| 1 hr      | 1          | 0.118 | 0.122 | 0.124 | 0.121 | 0.003 | 0.103 | 0.014 | <b>10.350</b> | 1.397 |
|           | 2          | 0.096 | 0.090 | 0.093 | 0.093 | 0.003 |       |       |               |       |
|           | 3          | 0.096 | 0.102 | 0.090 | 0.096 | 0.006 |       |       |               |       |
| 2 hr      | 1          | 0.137 | 0.118 | 0.122 | 0.126 | 0.010 | 0.104 | 0.019 | <b>10.406</b> | 1.903 |
|           | 2          | 0.081 | 0.096 | 0.088 | 0.088 | 0.008 |       |       |               |       |
|           | 3          | 0.111 | 0.095 | 0.088 | 0.098 | 0.012 |       |       |               |       |
| 4 hr      | 1          | 0.131 | 0.127 | 0.133 | 0.130 | 0.003 | 0.113 | 0.018 | <b>11.251</b> | 1.775 |
|           | 2          | 0.089 | 0.093 | 0.093 | 0.092 | 0.002 |       |       |               |       |
|           | 3          | 0.117 | 0.104 | 0.125 | 0.115 | 0.011 |       |       |               |       |
| 6 hr      | 1          | 0.101 | 0.123 | 0.105 | 0.110 | 0.012 | 0.099 | 0.021 | <b>9.869</b>  | 2.089 |
|           | 2          | 0.121 | 0.106 | 0.105 | 0.111 | 0.009 |       |       |               |       |
|           | 3          | 0.095 | 0.058 | 0.075 | 0.076 | 0.018 |       |       |               |       |
| 8 hr      | 1          | 0.101 | 0.099 | 0.104 | 0.102 | 0.002 | 0.099 | 0.017 | <b>9.879</b>  | 1.717 |
|           | 2          | 0.115 | 0.112 | 0.123 | 0.116 | 0.005 |       |       |               |       |
|           | 3          | 0.077 | 0.074 | 0.084 | 0.078 | 0.005 |       |       |               |       |
| 16 hr     | 1          | 0.101 | 0.084 | 0.103 | 0.096 | 0.010 | 0.100 | 0.012 | <b>10.003</b> | 1.244 |
|           | 2          | 0.110 | 0.121 | 0.109 | 0.113 | 0.006 |       |       |               |       |
|           | 3          | 0.082 | 0.093 | 0.097 | 0.091 | 0.008 |       |       |               |       |

**d. LucF activity in tunicamycin-treated condition**

| Firefly       | Experiment | A        | B        | C        | Mean     | SD      | Mean            | SD       |
|---------------|------------|----------|----------|----------|----------|---------|-----------------|----------|
| <b>0 hr</b>   | 1          | 330238.0 | 263198.0 | 315056.3 | 302830.8 | 35152.4 | <b>178692.1</b> | 94910.2  |
|               | 2          | 121658.5 | 107024.5 | 118294.8 | 115659.3 | 7664.7  |                 |          |
|               | 3          | 125927.2 | 116417.2 | 110414.8 | 117586.4 | 7822.0  |                 |          |
| <b>30 min</b> | 1          | 282600.0 | 322451.0 | 280620.7 | 295223.9 | 23600.1 | <b>182837.9</b> | 87033.1  |
|               | 2          | 113994.8 | 103369.0 | 111196.8 | 109520.2 | 5507.8  |                 |          |
|               | 3          | 136830.0 | 166656.5 | 127822.7 | 143769.7 | 20325.8 |                 |          |
| <b>1 hr</b>   | 1          | 309715.5 | 332301.7 | 313212.3 | 318409.8 | 12157.1 | <b>198679.6</b> | 90976.5  |
|               | 2          | 121677.5 | 148032.8 | 132898.2 | 134202.8 | 13226.0 |                 |          |
|               | 3          | 121353.5 | 164486.3 | 144438.3 | 143426.1 | 21584.2 |                 |          |
| <b>2 hr</b>   | 1          | 299929.7 | 260726.7 | 292908.0 | 284521.4 | 20903.8 | <b>221246.7</b> | 51679.6  |
|               | 2          | 159569.5 | 192234.8 | 168987.2 | 173597.2 | 16813.5 |                 |          |
|               | 3          | 190302.3 | 210124.3 | 216438.0 | 205621.6 | 13637.2 |                 |          |
| <b>4 hr</b>   | 1          | 347892.0 | 354078.7 | 400105.0 | 367358.6 | 28527.5 | <b>292495.3</b> | 61888.8  |
|               | 2          | 259245.8 | 282544.8 | 238078.2 | 259956.3 | 22241.8 |                 |          |
|               | 3          | 224342.0 | 291896.7 | 234274.7 | 250171.1 | 36475.1 |                 |          |
| <b>6 hr</b>   | 1          | 356302.3 | 428454.0 | 302438.3 | 362398.2 | 63228.6 | <b>238590.1</b> | 108038.6 |
|               | 2          | 235493.7 | 232295.3 | 216127.0 | 227972.0 | 10382.0 |                 |          |
|               | 3          | 127080.0 | 110351.7 | 138768.7 | 125400.1 | 14282.8 |                 |          |
| <b>8 hr</b>   | 1          | 326461.7 | 261567.7 | 330131.3 | 306053.6 | 38569.6 | <b>238036.2</b> | 61799.8  |
|               | 2          | 244925.3 | 219002.7 | 242935.7 | 235621.2 | 14426.4 |                 |          |
|               | 3          | 161368.0 | 168720.3 | 187213.0 | 172433.8 | 13316.7 |                 |          |
| <b>16 hr</b>  | 1          | 171661.7 | 163881.0 | 188363.3 | 174635.3 | 12509.1 | <b>114614.5</b> | 47414.3  |
|               | 2          | 91344.3  | 107191.0 | 99947.3  | 99494.2  | 7933.0  |                 |          |
|               | 3          | 67987.7  | 70713.3  | 70440.7  | 69713.9  | 1501.2  |                 |          |

**e. LucR activity in tunicamycin-treated condition**

| Time          | Experiment | A         | B         | C         | Mean      | SD       | Mean      | SD       |
|---------------|------------|-----------|-----------|-----------|-----------|----------|-----------|----------|
| <b>0 hr</b>   | 1          | 2344036.2 | 1988893.0 | 2333051.2 | 2221993.4 | 201945.6 | 1461994.1 | 583372.5 |
|               | 2          | 1195947.5 | 1080045.5 | 1191256.5 | 1155749.8 | 65603.8  |           |          |
|               | 3          | 989012.7  | 1014182.5 | 1021522.0 | 1008239.1 | 17050.1  |           |          |
| <b>30 min</b> | 1          | 2190362.5 | 2488053.5 | 2361411.2 | 2346609.1 | 149396.5 | 1611279.6 | 558289.4 |
|               | 2          | 1215983.2 | 1188291.0 | 1266115.8 | 1223463.3 | 39448.0  |           |          |
|               | 3          | 1244480.2 | 1342541.0 | 1204277.8 | 1263766.3 | 71120.6  |           |          |
| <b>1 hr</b>   | 1          | 2519352.5 | 3296183.2 | 2840592.2 | 2885375.9 | 390346.8 | 1921587.4 | 750546.9 |
|               | 2          | 1367957.0 | 1492412.2 | 1516657.2 | 1459008.8 | 79779.5  |           |          |
|               | 3          | 1355852.0 | 1470145.2 | 1435135.2 | 1420377.4 | 58558.3  |           |          |
| <b>2 hr</b>   | 1          | 2253047.2 | 2159190.5 | 2052057.5 | 2154765.1 | 100567.9 | 1706877.6 | 355070.3 |
|               | 2          | 1536801.2 | 1712668.5 | 1368361.8 | 1539277.2 | 172166.7 |           |          |
|               | 3          | 1490108.5 | 1420080.2 | 1369582.8 | 1426590.5 | 60526.0  |           |          |
| <b>4 hr</b>   | 1          | 1547421.5 | 1539107.2 | 1660363.8 | 1582297.5 | 67735.1  | 1415550.4 | 150149.6 |
|               | 2          | 1456116.2 | 1412693.5 | 1311993.2 | 1393600.9 | 73934.1  |           |          |
|               | 3          | 1182851.8 | 1335946.8 | 1293459.8 | 1270752.8 | 79033.1  |           |          |
| <b>6 hr</b>   | 1          | 1872376.7 | 1964340.0 | 1684349.3 | 1840355.3 | 142715.5 | 1218155.4 | 484704.8 |
|               | 2          | 1016881.0 | 1100805.0 | 960128.7  | 1025938.2 | 70774.2  |           |          |
|               | 3          | 776874.7  | 822709.7  | 764934.0  | 788172.8  | 30499.9  |           |          |
| <b>8 hr</b>   | 1          | 1351321.3 | 1165751.7 | 1358166.7 | 1291746.6 | 109168.4 | 1024160.2 | 210633.9 |
|               | 2          | 910449.0  | 830987.0  | 844285.7  | 861907.2  | 42561.0  |           |          |
|               | 3          | 931342.0  | 921760.3  | 903378.3  | 918826.9  | 14210.8  |           |          |
| <b>16 hr</b>  | 1          | 629519.0  | 531319.7  | 574615.0  | 578484.6  | 49213.9  | 402223.1  | 141018.9 |
|               | 2          | 342765.7  | 385488.7  | 351502.0  | 359918.8  | 22570.9  |           |          |
|               | 3          | 277196.7  | 245075.0  | 282526.0  | 268265.9  | 20259.9  |           |          |

**f. LucF/LucR ratio in tunicamycin-treated condition**

| Time   | Experiment | A     | B     | C     | Mean  | SD    | Mean  | SD    | Mean (x100)   | SD    |
|--------|------------|-------|-------|-------|-------|-------|-------|-------|---------------|-------|
| 0 hr   | 1          | 0.141 | 0.132 | 0.135 | 0.136 | 0.004 | 0.118 | 0.017 | <b>11.762</b> | 1.653 |
|        | 2          | 0.102 | 0.099 | 0.099 | 0.100 | 0.001 |       |       |               |       |
|        | 3          | 0.127 | 0.115 | 0.108 | 0.117 | 0.010 |       |       |               |       |
| 30 min | 1          | 0.129 | 0.130 | 0.119 | 0.126 | 0.006 | 0.110 | 0.017 | <b>10.958</b> | 1.704 |
|        | 2          | 0.094 | 0.087 | 0.088 | 0.090 | 0.004 |       |       |               |       |
|        | 3          | 0.110 | 0.124 | 0.106 | 0.113 | 0.009 |       |       |               |       |
| 1 hr   | 1          | 0.123 | 0.101 | 0.110 | 0.111 | 0.011 | 0.101 | 0.012 | <b>10.131</b> | 1.196 |
|        | 2          | 0.089 | 0.099 | 0.088 | 0.092 | 0.006 |       |       |               |       |
|        | 3          | 0.090 | 0.112 | 0.101 | 0.101 | 0.011 |       |       |               |       |
| 2 hr   | 1          | 0.133 | 0.121 | 0.143 | 0.132 | 0.011 | 0.130 | 0.017 | <b>12.999</b> | 1.737 |
|        | 2          | 0.104 | 0.112 | 0.123 | 0.113 | 0.010 |       |       |               |       |
|        | 3          | 0.128 | 0.148 | 0.158 | 0.145 | 0.015 |       |       |               |       |
| 4 hr   | 1          | 0.225 | 0.230 | 0.241 | 0.232 | 0.008 | 0.205 | 0.024 | <b>20.496</b> | 2.400 |
|        | 2          | 0.178 | 0.200 | 0.181 | 0.187 | 0.012 |       |       |               |       |
|        | 3          | 0.190 | 0.218 | 0.181 | 0.196 | 0.020 |       |       |               |       |
| 6 hr   | 1          | 0.190 | 0.218 | 0.180 | 0.196 | 0.020 | 0.193 | 0.032 | <b>19.276</b> | 3.187 |
|        | 2          | 0.232 | 0.211 | 0.225 | 0.223 | 0.011 |       |       |               |       |
|        | 3          | 0.164 | 0.134 | 0.181 | 0.160 | 0.024 |       |       |               |       |
| 8 hr   | 1          | 0.242 | 0.224 | 0.243 | 0.236 | 0.010 | 0.233 | 0.039 | <b>23.254</b> | 3.906 |
|        | 2          | 0.269 | 0.264 | 0.288 | 0.273 | 0.013 |       |       |               |       |
|        | 3          | 0.173 | 0.183 | 0.207 | 0.188 | 0.017 |       |       |               |       |
| 16 hr  | 1          | 0.273 | 0.308 | 0.328 | 0.303 | 0.028 | 0.280 | 0.026 | <b>28.011</b> | 2.639 |
|        | 2          | 0.266 | 0.278 | 0.284 | 0.276 | 0.009 |       |       |               |       |
|        | 3          | 0.245 | 0.289 | 0.249 | 0.261 | 0.024 |       |       |               |       |

**g. Endogenous FGF1 expression measured by capillary electrophoresis (4 hr of treatment)**

| Experiment  | UNT              | tm               | Normalized to UNT |
|-------------|------------------|------------------|-------------------|
| 1           | 176220.0         | 189739.8         | 1.08              |
| 2           | 126283.6         | 121466.3         | 0.96              |
| 3           | 97719.8          | 132664.7         | 1.36              |
| 4           | 170646.9         | 190332.6         | 1.12              |
| 5           | 325821.6         | 356035.9         | 1.09              |
| 6           | 292197.7         | 290063.6         | 0.99              |
| 7           | 143365.8         | 172500.3         | 1.20              |
| 8           | 175276.9         | 210845.4         | 1.20              |
| 9           | 154490.7         | 191947.8         | 1.24              |
| <b>Mean</b> | <b>184669.22</b> | <b>206177.38</b> | <b>1.14</b>       |
| SD          | 55262.41         | 52980.61         | 0.10              |

**Table S6. Kinetics of FGF1 IRES activity.**

**a-f.** Cardiomyocytes AC16 transduced with the bicistronic lentivector with the FGF1 IRES were submitted to tunicamycin treatment and the time-course of FGF1 IRES activity (0 hr, 30 min, 1 hr, 2 hr, 4 hr, 6 hr, 8 hr, 16 hr) was evaluated by measuring Firefly/Renilla ratio. Experiments were performed three times with 3 biological replicates (n=9) and each time point was compared to 0 hr time point with a non parametric Mann-Whitney test (Fig. 4b).

**g.** Endogenous FGF1 expression was measured by capillary electrophoresis, after 4 hr of treatment. 9 independent experiments have been performed.
