# Supplementary material for: Mitochondrial Ribosomal Protein MRPS15 Is a Component of Cytosolic Ribosomes and Regulates Translation in Stressed Cardiomyocytes
Source: MDPI journal article supplement (doi:10.3390/ijms25063250), 2024-03-13
Supplement: s1 [file s1]

**a. GRP78 expression (% of T0)**

| Time               | Experiment |        |        |        |         | Mean          | SD     |
|--------------------|------------|--------|--------|--------|---------|---------------|--------|
|                    | 1          | 2      | 3      | 4      | 5       |               |        |
| <b>0 hr</b>        | 100.00     | 100.00 | 100.00 | 100.00 | 100.00  | <b>100.00</b> | 0.00   |
| <b>0 hr 30 min</b> | 78.94      | 72.30  | 78.68  | 138.63 | 125.74  | <b>92.14</b>  | 31.15  |
| <b>1 hr</b>        | 105.69     | 121.36 | 89.18  | 133.07 | 65.69   | <b>112.32</b> | 19.07  |
| <b>2 hr</b>        | 94.74      | 153.69 | 114.06 | 98.30  | 112.02  | <b>115.20</b> | 27.00  |
| <b>4 hr</b>        | 127.44     | 154.74 | 112.22 | 132.49 | 161.19  | <b>131.72</b> | 17.60  |
| <b>6 hr</b>        | 117.75     | 152.24 | 73.64  | 88.47  | 160.72  | <b>108.02</b> | 34.71  |
| <b>8 hr</b>        | 154.92     | 126.35 | 134.81 | 209.33 | 570.30  | <b>156.36</b> | 37.30  |
| <b>16 hr</b>       | 260.39     | 202.71 | 197.33 | 514.03 | 1328.58 | <b>293.61</b> | 149.69 |

**b. eIF2 $\alpha$  phosphorylation (ratio P-eIF2 $\alpha$ /total eIF2 $\alpha$ )**

| Time               | Experiment |      |      |      |       | Mean        | SD   |
|--------------------|------------|------|------|------|-------|-------------|------|
|                    | 1          | 2    | 3    | 4    | 5     |             |      |
| <b>0 hr</b>        | 1.21       | 3.29 | 2.87 | 1.34 | 1.06  | <b>2.18</b> | 1.06 |
| <b>0 hr 30 min</b> | 1.77       | 1.57 | 2.34 | 0.85 | 1.36  | <b>1.63</b> | 0.61 |
| <b>1 hr</b>        | 2.14       | 2.79 | 2.19 | 1.24 | 3.10  | <b>2.09</b> | 0.64 |
| <b>2 hr</b>        | 3.88       | 5.27 | 7.12 | 1.50 | 4.99  | <b>4.44</b> | 2.37 |
| <b>4 hr</b>        | 3.03       | 6.07 | 5.40 | 0.87 | 7.39  | <b>3.84</b> | 2.37 |
| <b>6 hr</b>        | 4.29       | 2.91 | 3.38 | 1.52 | 5.31  | <b>3.03</b> | 1.16 |
| <b>8 hr</b>        | 5.76       | 5.89 | 4.55 | 1.55 | 5.01  | <b>4.44</b> | 2.02 |
| <b>16 hr</b>       | 5.68       | 4.61 | 6.05 | 1.64 | 10.34 | <b>4.50</b> | 2.00 |

**c. eIF2 $\alpha$  phosphorylation (4 hr)**

| Experiment | Condition | eIF2 $\alpha$ (AU) | p-eIF2 $\alpha$ (AU) | Ratio | Tm/unt       |
|------------|-----------|--------------------|----------------------|-------|--------------|
| <b>1</b>   | unt       | 654311.7           | 11974.4              | 0.018 | <b>26.87</b> |
|            | tm        | 48095.8            | 23647.4              | 0.49  |              |
| <b>2</b>   | unt       | 511417.8           | 12569.6              | 0.025 | <b>1.76</b>  |
|            | tm        | 459455.1           | 19903.5              | 0.043 |              |
| <b>3</b>   | unt       | 441216.7           | 18189.3              | 0.041 | <b>1.15</b>  |
|            | tm        | 519647.2           | 24571.2              | 0.047 |              |
| <b>4</b>   | unt       | 712303.7           | 49168.3              | 0.069 | <b>0.81</b>  |
|            | tm        | 925904.8           | 51966.9              | 0.056 |              |
| <b>5</b>   | unt       | 377470.9           | 19633.8              | 0.052 | <b>2.41</b>  |
|            | tm        | 334187.2           | 41832.5              | 0.125 |              |

**d. GRP78 expression (4 hr)**

| Experiment | Condition | GRP78 (AU) | GRP78 normalized to Ctrl |
|------------|-----------|------------|--------------------------|
| <b>1</b>   | unt       | nd         | <b>nd</b>                |
|            | tm        | 21328.4    |                          |
| <b>2</b>   | unt       | 12912.5    | <b>1.02</b>              |
|            | tm        | 13194.6    |                          |
| <b>3</b>   | unt       | 36890.2    | <b>1.34</b>              |
|            | tm        | 49611.0    |                          |
| <b>4</b>   | unt       | 29254.2    | <b>0.64</b>              |
|            | tm        | 18791.7    |                          |
| <b>5</b>   | unt       | 9921.5     | <b>0.69</b>              |
|            | tm        | 6876.5     |                          |

**e. Ratios of polysomes/monosomes (4 hr)**

| Experiment | Condition | P/ M  |
|------------|-----------|-------|
| <b>1</b>   | UNT       | 2.838 |
|            | tm        | 1.914 |
| <b>2</b>   | UNT       | 2.395 |
|            | tm        | 1.994 |
| <b>3</b>   | UNT       | 2.593 |
|            | tm        | 1.723 |
| <b>4</b>   | UNT       | 2.331 |
|            | tm        | 1.637 |
| <b>5</b>   | UNT       | 2.300 |
|            | tm        | 1.286 |

**Table S1 : ER-stress marker induction and polysome/monosome ratios.**

Kinetics of ER stress induction were performed (5 independent experiments) and ER stress was measured with GRP78 expression (a) and eIF2 $\alpha$  phosphorylation (b). 5 independent experiments were performed with a 4 hr treatment to be analysed by mass spectrometry. GRP78 expression (c) and eIF2 $\alpha$  phosphorylation (d) and polysome/monosome ratio (e) were measured for each experiment. Mass spectrometry was performed with samples 1, 3, 4 and 5, based on the lower polysome/monosome ratio in the tm condition.
