# Supplementary material for: Mitochondrial Ribosomal Protein MRPS15 Is a Component of Cytosolic Ribosomes and Regulates Translation in Stressed Cardiomyocytes
Source: MDPI journal article supplement (doi:10.3390/ijms25063250), 2024-03-13
Supplement: s1 [file s1]

**a. MRPS15 expression (AU)**

| Condition | Sample    | Experiment |         |         |         |         |          | Mean           | SD      |
|-----------|-----------|------------|---------|---------|---------|---------|----------|----------------|---------|
|           |           | 1          | 2       | 3       | 4       | 5       | 6        |                |         |
| unt       | Si-       | 68294.6    | 87855.3 | 71193.2 | 28117.0 | 42069.0 | 137620.8 | <b>72525.0</b> | 26808.7 |
|           | Si MRPS15 | 51161.7    | 50953.2 | 76298.7 | 20481.3 | 32556.3 | 120528.9 | <b>58663.4</b> | 26500.3 |
| tm        | Si-       |            | 29609.1 | 91584.3 | 48488.5 | 52193.0 | 85240.0  | <b>61423.0</b> | 21591.3 |
|           | Si MRPS15 |            | 21309.5 | 85577.6 | 69216.5 | 35295.6 | 48560.4  | <b>51991.9</b> | 20324.1 |

**b. MRPS15 expression normalized to Si-**

| Condition | Sample    | Experiment |      |      |      |      |      | Mean        | SD   |
|-----------|-----------|------------|------|------|------|------|------|-------------|------|
|           |           | 1          | 2    | 3    | 4    | 5    | 6    |             |      |
| unt       | Si-       | 0.94       | 1.21 | 0.98 | 0.39 | 0.58 | 1.90 | <b>1.00</b> | 0.37 |
|           | Si MRPS15 | 0.71       | 0.70 | 1.05 | 0.28 | 0.45 | 1.66 | <b>0.81</b> | 0.37 |
| tm        | Si-       |            | 0.48 | 1.49 | 0.79 | 0.85 | 1.39 | <b>1.00</b> | 0.35 |
|           | Si MRPS15 |            | 0.35 | 1.39 | 1.13 | 0.57 | 0.79 | <b>0.85</b> | 0.33 |

**c. Bicistronic mRNA with FGF1 IRES : LucF activity**

| Condition | Sample    | Experiment | A        | B        | C        | Mean            | SD      |
|-----------|-----------|------------|----------|----------|----------|-----------------|---------|
| unt       | Si-       | 1          | 242297.3 | 233101.0 | 241521.7 | <b>262345.7</b> | 39406.3 |
|           |           | 2          | 322063.3 | 312528.3 | 314891.3 |                 |         |
|           |           | 3          | 182708.0 | 221168.3 | 223989.3 |                 |         |
|           |           | 4          | 255196.3 | 303162.3 | 295521.3 |                 |         |
|           | Si MRPS15 | 1          | 124823.3 | 120786.7 | 95192.0  | <b>196425.9</b> | 59351.8 |
|           |           | 2          | 182340.7 | 166837.0 | 168049.3 |                 |         |
|           |           | 3          | 160841.0 | 234414.0 | 256492.3 |                 |         |
|           |           | 4          | 218627.0 | 321815.3 | 306891.7 |                 |         |
| tm        | Si-       | 1          | 363242.0 | 326820.7 | 285572.0 | <b>349378.9</b> | 24477.1 |
|           |           | 2          | 406631.7 | 363396.0 | 348966.7 |                 |         |
|           |           | 3          | 313251.0 | 360163.0 | 325421.7 |                 |         |
|           |           | 4          | 352380.0 | 379283.3 | 367418.3 |                 |         |
|           | Si MRPS15 | 1          | 138137.0 | 140459.0 | 163327.3 | <b>248561.9</b> | 71884.2 |
|           |           | 2          | 223652.7 | 193383.3 | 201106.7 |                 |         |
|           |           | 3          | 277270.7 | 304662.0 | 265350.3 |                 |         |
|           |           | 4          | 415622.7 | 386190.3 | 273580.3 |                 |         |

**d. Bicistronic mRNA with FGF1 IRES : LucR activity**

| Condition | Sample    | Experiment | A         | B         | C         | Moyenne          | SD       |
|-----------|-----------|------------|-----------|-----------|-----------|------------------|----------|
| unt       | Si-       | 1          | 242297.3  | 233101.0  | 241521.7  | <b>2079143.0</b> | 968407.1 |
|           |           | 2          | 3454086.3 | 3171775.7 | 3374068.0 |                  |          |
|           |           | 3          | 1789209.7 | 2256620.3 | 2439872.3 |                  |          |
|           |           | 4          | 2185324.0 | 3016508.3 | 2545331.3 |                  |          |
|           | Si MRPS15 | 1          | 124823.3  | 120786.7  | 95192.0   | <b>1780223.4</b> | 860906.0 |
|           |           | 2          | 2172762.0 | 2052839.0 | 2205825.3 |                  |          |
|           |           | 3          | 1614655.7 | 2321493.7 | 2565375.0 |                  |          |
|           |           | 4          | 1964949.7 | 2975219.0 | 3148760.0 |                  |          |
| tm        | Si-       | 1          | 363242.0  | 326820.7  | 285572.0  | <b>1628785.1</b> | 651786.8 |
|           |           | 2          | 2573645.3 | 2341658.0 | 2161048.7 |                  |          |
|           |           | 3          | 1704756.3 | 1946629.0 | 1693801.7 |                  |          |
|           |           | 4          | 2100751.7 | 2111874.0 | 1935621.7 |                  |          |
|           | Si MRPS15 | 1          | 138137.0  | 140459.0  | 163327.3  | <b>1383592.0</b> | 620233.6 |
|           |           | 2          | 1682956.3 | 1371043.0 | 1389566.7 |                  |          |
|           |           | 3          | 1792124.3 | 1893398.7 | 1553409.0 |                  |          |
|           |           | 4          | 2777367.7 | 2124170.0 | 1577144.7 |                  |          |

e. Bicistronic mRNA with FGF1 IRES : LucF/ LucR ratio

| Condition | Sample    | Experiment | A     | B     | C     | Mean  | SD    | Mean<br>x100  | SD    |
|-----------|-----------|------------|-------|-------|-------|-------|-------|---------------|-------|
| unt       | Si-       | 1          | 0.097 | 0.109 | 0.090 | 0.100 | 0.007 | <b>10.047</b> | 0.695 |
|           |           | 2          | 0.093 | 0.099 | 0.093 |       |       |               |       |
|           |           | 3          | 0.102 | 0.098 | 0.092 |       |       |               |       |
|           |           | 4          | 0.117 | 0.101 | 0.116 |       |       |               |       |
|           | Si MRPS15 | 1          | 0.096 | 0.091 | 0.079 | 0.094 | 0.010 | <b>9.378</b>  | 0.955 |
|           |           | 2          | 0.084 | 0.081 | 0.076 |       |       |               |       |
|           |           | 3          | 0.100 | 0.101 | 0.100 |       |       |               |       |
|           |           | 4          | 0.111 | 0.108 | 0.097 |       |       |               |       |
| tm        | Si-       | 1          | 0.190 | 0.198 | 0.188 | 0.179 | 0.012 | <b>17.910</b> | 1.233 |
|           |           | 2          | 0.158 | 0.155 | 0.161 |       |       |               |       |
|           |           | 3          | 0.184 | 0.185 | 0.192 |       |       |               |       |
|           |           | 4          | 0.168 | 0.180 | 0.190 |       |       |               |       |
|           | Si MRPS15 | 1          | 0.167 | 0.170 | 0.164 | 0.159 | 0.012 | <b>15.930</b> | 1.225 |
|           |           | 2          | 0.133 | 0.141 | 0.145 |       |       |               |       |
|           |           | 3          | 0.155 | 0.161 | 0.171 |       |       |               |       |
|           |           | 4          | 0.150 | 0.182 | 0.173 |       |       |               |       |

**f. Bicistronic mRNA with a hairpin : LucF activity**

| Condition | Sample    | Experiment | A        | B        | C        | Mean            | SD      |
|-----------|-----------|------------|----------|----------|----------|-----------------|---------|
| unt       | Si-       | 1          | 317308.3 | 315326.7 | 315837.7 | <b>232368.5</b> | 55859.4 |
|           |           | 2          | 193504.3 | 196571.0 | 199433.0 |                 |         |
|           |           | 3          | 163875.0 | 186669.3 | 202791.0 |                 |         |
|           | Si MRPS15 | 1          | 124354.0 | 157638.7 | 155482.7 | <b>182301.6</b> | 29236.9 |
|           |           | 2          | 175063.0 | 195892.0 | 199808.0 |                 |         |
|           |           | 3          | 167403.3 | 251739.7 | 213332.7 |                 |         |
| tm        | Si-       | 1          | 402318.0 | 361439.0 | 317126.0 | <b>248447.0</b> | 74564.9 |
|           |           | 2          | 201913.0 | 173321.3 | 174252.7 |                 |         |
|           |           | 3          | 213780.0 | 215829.3 | 176044.0 |                 |         |
|           | Si MRPS15 | 1          | 175463.0 | 118725.3 | 126208.3 | <b>186128.1</b> | 33569.2 |
|           |           | 2          | 203615.7 | 224643.7 | 173054.7 |                 |         |
|           |           | 3          | 234116.7 | 208701.0 | 210625.0 |                 |         |

**g. Bicistronic mRNA with a hairpin : LucR activity**

| Condition | Sample    | Experiment | A         | B         | C         | Mean      | SD        |
|-----------|-----------|------------|-----------|-----------|-----------|-----------|-----------|
| unt       | Si-       | 1          | 8835174.7 | 8546045.3 | 7955712.3 | 5794113.3 | 1767687.2 |
|           |           | 2          | 4042809.0 | 4359879.3 | 4463674.7 |           |           |
|           |           | 3          | 4875088.0 | 4734438.3 | 4334198.3 |           |           |
|           | Si MRPS15 | 1          | 3747066.0 | 4529719.3 | 4396046.0 | 4798339.6 | 776255.9  |
|           |           | 2          | 4327529.7 | 4099460.3 | 4197065.0 |           |           |
|           |           | 3          | 6181961.7 | 5786070.7 | 5920138.0 |           |           |
| tm        | Si-       | 1          | 6529759.0 | 5729023.3 | 5865106.7 | 4344818.7 | 1130985.1 |
|           |           | 2          | 3651268.7 | 3172034.3 | 3431234.7 |           |           |
|           |           | 3          | 3657035.3 | 3474025.3 | 3593880.7 |           |           |
|           | Si MRPS15 | 1          | 3094594.0 | 2350165.3 | 2295466.7 | 3280997.6 | 525819.9  |
|           |           | 2          | 3478618.0 | 3380043.7 | 3017575.0 |           |           |
|           |           | 3          | 4486510.3 | 4071462.0 | 3354543.3 |           |           |

#### h. Bicistronic mRNA with a hairpin : LucF/ LucR ratio

| Condition | Sample    | Experiment | A     | B     | C     | Mean  | SD    | Mean (x100)  | SD    |
|-----------|-----------|------------|-------|-------|-------|-------|-------|--------------|-------|
| unt       | Si-       | 1          | 0.036 | 0.037 | 0.040 | 0.041 | 0.004 | <b>0.041</b> | 0.004 |
|           |           | 2          | 0.048 | 0.045 | 0.045 |       |       |              |       |
|           |           | 3          | 0.034 | 0.039 | 0.047 |       |       |              |       |
|           | Si MRPS15 | 1          | 0.033 | 0.035 | 0.035 | 0.038 | 0.006 | <b>0.038</b> | 0.006 |
|           |           | 2          | 0.040 | 0.048 | 0.048 |       |       |              |       |
|           |           | 3          | 0.027 | 0.044 | 0.036 |       |       |              |       |
| tm        | Si-       | 1          | 0.062 | 0.063 | 0.054 | 0.057 | 0.004 | <b>0.057</b> | 0.004 |
|           |           | 2          | 0.055 | 0.055 | 0.051 |       |       |              |       |
|           |           | 3          | 0.058 | 0.062 | 0.049 |       |       |              |       |
|           | Si MRPS15 | 1          | 0.057 | 0.051 | 0.055 | 0.057 | 0.004 | <b>0.057</b> | 0.004 |
|           |           | 2          | 0.059 | 0.066 | 0.057 |       |       |              |       |
|           |           | 3          | 0.052 | 0.051 | 0.063 |       |       |              |       |

**i. Endogenous FGF1 expression (AU)**

| Condition  | Sample    | Experiment |          |          |          |          | Mean            | SD       |
|------------|-----------|------------|----------|----------|----------|----------|-----------------|----------|
|            |           | 1          | 2        | 3        | 4        | 5        |                 |          |
| <b>unt</b> | Si-       | 176875.2   | 134600.7 | 116210.8 | 141413.3 | 474705.0 | <b>208761.0</b> | 106377.6 |
|            | Si MRPS15 | 165304.5   | 120992.9 | 118454.7 | 151121.9 | 159686.1 | <b>186677.0</b> | 72608.3  |
| <b>tm</b>  | Si-       | 168838.1   | 114327.3 | 211466.0 | 165122.4 | 438622.4 | <b>219675.2</b> | 87578.9  |
|            | Si MRPS15 | 170666.7   | 107918.0 | 143150.8 | 120814.8 | 144252.9 | <b>185696.0</b> | 80559.0  |

**j. Endogenous FGF1 expression normalized to Si-**

| Condition  | Sample    | Experiment |      |      |      |      | Mean        | SD   |
|------------|-----------|------------|------|------|------|------|-------------|------|
|            |           | 1          | 2    | 3    | 4    | 5    |             |      |
| <b>unt</b> | Si-       | 0.85       | 0.64 | 0.56 | 0.68 | 2.27 | <b>1.00</b> | 0.51 |
|            | Si MRPS15 | 0.79       | 0.58 | 0.57 | 0.72 | 0.76 | <b>0.89</b> | 0.35 |
| <b>tm</b>  | Si-       | 0.77       | 0.52 | 0.96 | 0.75 | 2.00 | <b>1.00</b> | 0.40 |
|            | Si MRPS15 | 0.78       | 0.49 | 0.65 | 0.55 | 0.66 | <b>0.85</b> | 0.37 |

**Table S8. Effect of MRPS15 knock-down on IRES activity.**

a-b) Cells were transfected with MRPS15 siRNA and protein depletion was measured after 48 hr by capillary electrophoresis Simple Western (Fig. 5a).

c-h) FGF1 IRES activity and hairpin control activity were obtained by measuring Firefly/Renilla ratio, the experiment was performed 4 times with 3 biological replicates (n=12) for the FGF1 IRES and 3 times (n=9) for the hairpin (Fig. 5b). Data were pooled and showed in a histogram corresponding to the mean +/- SEM. Data of SiMRPS15 transfection were compared to corresponding Si control with a 2way ANOVA test.

i-j) Endogeneous FGF1 expression was analyzed by capillary electrophoresis. 6 independent experiments were performed (Fig. 5c).
