# Supplementary material for: Mitochondrial Ribosomal Protein MRPS15 Is a Component of Cytosolic Ribosomes and Regulates Translation in Stressed Cardiomyocytes
Source: MDPI journal article supplement (doi:10.3390/ijms25063250), 2024-03-13
Supplement: s1 [file s1]

**a. MRPS15 overexpression (AU)**

| Condition | Sample    | Experiment |          |         |         |         |          |          |         | Mean           | SD      |
|-----------|-----------|------------|----------|---------|---------|---------|----------|----------|---------|----------------|---------|
|           |           | 1          | 2        | 3       | 4       | 5       | 6        | 7        | 8       |                |         |
| unt       | Ctrl      | 74608.1    | 115702.5 | 76231.2 | 1090.5  | 10378.7 | 72716.3  |          |         | <b>58454.6</b> | 35146.6 |
|           | + cMRPS15 | 99683.3    | 118213.8 | 33387.7 | 17860.3 | 22156.7 | 120864.8 | 86416.3  | 88205.9 | <b>73348.6</b> | 36660.3 |
| tm        | Ctrl      | 103786.3   | 98110.3  | 44773.4 | 6624.3  | 7985.4  | 77991.4  |          |         | <b>56545.2</b> | 36750.8 |
|           | + cMRPS15 | 135055.3   | 61547.1  | 69374.6 | 5123.6  | 7855.6  | 77592.9  | 103561.6 | 98329.3 | <b>69805.0</b> | 33829.8 |

**b. MRPS15 overexpression normalized to NT**

| Condition | Sample    | Experiment |      |      |      |      |      |      |      | Mean        | SD   |
|-----------|-----------|------------|------|------|------|------|------|------|------|-------------|------|
|           |           | 1          | 2    | 3    | 4    | 5    | 6    | 7    | 8    |             |      |
| unt       | Ctrl      | 1.28       | 1.98 | 1.30 | 0.02 | 0.18 | 1.24 |      |      | <b>1.00</b> | 0.60 |
|           | + cMRPS15 | 1.71       | 2.02 | 0.57 | 0.31 | 0.38 | 2.07 | 1.48 | 1.51 | <b>1.25</b> | 0.63 |
| tm        | Ctrl      | 1.84       | 1.74 | 0.79 | 0.12 | 0.14 | 1.38 |      |      | <b>1.00</b> | 0.65 |
|           | + cMRPS15 | 2.39       | 1.09 | 1.23 | 0.09 | 0.14 | 1.37 | 1.83 | 1.74 | <b>1.23</b> | 0.60 |

**c. Bicistronic mRNA with FGF1 IRES : LucF activity**

| Condition | Sample    | Experiment | A        | B        | C        | Mean            | SD       |
|-----------|-----------|------------|----------|----------|----------|-----------------|----------|
| unt       | Ctrl      | 1          | 390930.0 | 334163.3 | 334988.3 | <b>108156.5</b> | 122602.0 |
|           |           | 2          | 22939.7  | 26629.3  | 21690.0  |                 |          |
|           |           | 3          | 25945.3  | 26522.0  | 26280.3  |                 |          |
|           |           | 4          | 24720.7  | 24879.7  | 38189.2  |                 |          |
|           | + cMRPS15 | 1          | 373113.0 | 268811.7 | 271078.3 | <b>67571.2</b>  | 78921.0  |
|           |           | 2          | 29090.3  | 25298.7  | 24734.3  |                 |          |
|           |           |            | 19259.7  | 12885.7  | 17999.7  |                 |          |
|           |           | 3          | 24783.7  | 22600.3  | 24395.0  |                 |          |
|           |           |            | 15498.7  | 15741.7  | 19216.0  |                 |          |
|           |           | 4          | 16416.7  | 18871.7  | 16487.0  |                 |          |
|           |           |            |          |          |          |                 |          |
|           |           |            |          |          |          |                 |          |
| tm        | Ctrl      | 1          | 330645.0 | 448461.0 | 379019.3 | <b>123033.7</b> | 131504.0 |
|           |           | 2          | 34656.7  | 36246.0  | 28409.3  |                 |          |
|           |           | 3          | 39083.3  | 34783.7  | 31702.3  |                 |          |
|           |           | 4          | 38220.7  | 39609.3  | 35567.7  |                 |          |
|           | + cMRPS15 | 1          | 325793.0 | 354985.7 | 264589.7 | <b>76714.9</b>  | 79469.3  |
|           |           | 2          | 38626.7  | 35073.3  | 31535.7  |                 |          |
|           |           |            | 27183.0  | 20626.0  | 20220.7  |                 |          |
|           |           | 3          | 40598.0  | 34077.7  | 37689.0  |                 |          |
|           |           |            | 23244.7  | 24074.7  | 21205.0  |                 |          |
|           |           | 4          | 25598.0  | 27521.3  | 28225.3  |                 |          |
|           |           |            |          |          |          |                 |          |
|           |           |            |          |          |          |                 |          |

**d. Bicistronic mRNA with FGF1 IRES : LucR activity**

| Condition | Sample    | Experiment | A         | B         | C         | Mean             | SD        |
|-----------|-----------|------------|-----------|-----------|-----------|------------------|-----------|
| unt       | Ctrl      | 1          | 5382741.0 | 5570912.7 | 5503074.3 | <b>1660248.4</b> | 1912663.8 |
|           |           | 2          | 344686.3  | 373148.0  | 357865.7  |                  |           |
|           |           | 3          | 310763.0  | 377055.0  | 388159.0  |                  |           |
|           |           | 4          | 340433.7  | 403480.7  | 570661.8  |                  |           |
|           | + cMRPS15 | 1          | 4652681.7 | 4064922.0 | 3447235.7 | <b>914482.0</b>  | 1046821.5 |
|           |           | 2          | 374864.7  | 359798.0  | 352597.0  |                  |           |
|           |           |            | 251211.3  | 213511.7  | 278753.3  |                  |           |
|           |           | 3          | 341894.7  | 354414.7  | 387360.7  |                  |           |
|           |           |            | 200175.7  | 231530.7  | 222982.0  |                  |           |
|           |           | 4          | 224080.7  | 232906.3  | 269754.7  |                  |           |
|           |           |            |           |           |           |                  |           |
|           |           |            |           |           |           |                  |           |
| tm        | Ctrl      | 1          | 4770904.0 | 4775582.3 | 4719086.7 | <b>1406328.7</b> | 1674431.2 |
|           |           | 2          | 304204.0  | 296786.3  | 249560.7  |                  |           |
|           |           | 3          | 287103.0  | 257949.7  | 240724.7  |                  |           |
|           |           | 4          | 331517.3  | 345958.7  | 296566.7  |                  |           |
|           | + cMRPS15 | 1          | 4099537.7 | 3512178.7 | 3166935.3 | <b>782072.7</b>  | 936937.1  |
|           |           | 2          | 318958.0  | 283693.7  | 271228.7  |                  |           |
|           |           |            | 213010.0  | 167560.0  | 166890.3  |                  |           |
|           |           | 3          | 279656.7  | 243728.0  | 262560.0  |                  |           |
|           |           |            | 165937.0  | 162368.3  | 145298.3  |                  |           |
|           |           | 4          | 213762.0  | 213539.0  | 190466.3  |                  |           |
|           |           |            |           |           |           |                  |           |
|           |           |            |           |           |           |                  |           |

**e. Bicistronic mRNA with FGF1 IRES : LucF/ LucR ratio**

| Condition | Sample    | Experiment | A      | B      | C      | Mean   | SD     | Mean (x100)    | SD     |
|-----------|-----------|------------|--------|--------|--------|--------|--------|----------------|--------|
| unt       | Ctrl      | 1          | 0.0726 | 0.0600 | 0.0609 | 0.0679 | 0.0052 | <b>6.7895</b>  | 0.5160 |
|           |           | 2          | 0.0666 | 0.0714 | 0.0606 |        |        |                |        |
|           |           | 3          | 0.0835 | 0.0703 | 0.0677 |        |        |                |        |
|           |           | 4          | 0.0726 | 0.0617 | 0.0669 |        |        |                |        |
|           | + cMRPS15 | 1          | 0.0802 | 0.0661 | 0.0786 | 0.0717 | 0.0065 | <b>7.1714</b>  | 0.6451 |
|           |           | 2          | 0.0776 | 0.0703 | 0.0701 |        |        |                |        |
|           |           |            | 0.0767 | 0.0604 | 0.0646 |        |        |                |        |
|           |           | 3          | 0.0725 | 0.0638 | 0.0630 |        |        |                |        |
|           |           |            | 0.0774 | 0.0680 | 0.0862 |        |        |                |        |
|           |           | 4          | 0.0733 | 0.0810 | 0.0611 |        |        |                |        |
| tm        | Ctrl      | 1          | 0.0693 | 0.0939 | 0.0803 | 0.1122 | 0.0155 | <b>11.2150</b> | 1.5487 |
|           |           | 2          | 0.1139 | 0.1221 | 0.1138 |        |        |                |        |
|           |           | 3          | 0.1361 | 0.1348 | 0.1317 |        |        |                |        |
|           |           | 4          | 0.1153 | 0.1145 | 0.1199 |        |        |                |        |
|           | + cMRPS15 | 1          | 0.0795 | 0.1011 | 0.0835 | 0.1254 | 0.0155 | <b>12.5368</b> | 1.5467 |
|           |           | 2          | 0.1211 | 0.1236 | 0.1163 |        |        |                |        |
|           |           |            | 0.1276 | 0.1231 | 0.1212 |        |        |                |        |
|           |           | 3          | 0.1452 | 0.1398 | 0.1435 |        |        |                |        |
|           |           |            | 0.1401 | 0.1483 | 0.1459 |        |        |                |        |
|           |           | 4          | 0.1198 | 0.1289 | 0.1482 |        |        |                |        |

**f. Bicistronic mRNA with IGF1R IRES : LucF activity**

| Condition | Sample    | Experiment | A        | B        | C        | Mean            | SD      |
|-----------|-----------|------------|----------|----------|----------|-----------------|---------|
| unt       | Ctrl      | 1          | 128481.3 | 122097.7 | 118701.7 | <b>112076.2</b> | 16388.7 |
|           |           | 2          | 74221.7  | 86889.0  | 101369.0 |                 |         |
|           |           | 3          | 119512.0 | 120280.0 | 137133.7 |                 |         |
|           | + cMRPS15 | 1          | 147833.3 | 141550.0 | 110944.3 | <b>130652.6</b> | 18877.9 |
|           |           | 2          | 122181.7 | 104296.3 | 100237.3 |                 |         |
|           |           | 3          | 159110.0 | 148559.0 | 141161.0 |                 |         |
| tm        | Ctrl      | 1          | 103537.0 | 105539.7 | 94827.0  | <b>105184.4</b> | 13025.2 |
|           |           | 2          | 88138.5  | 85813.2  | 94993.2  |                 |         |
|           |           | 3          | 123570.3 | 126618.3 | 123622.7 |                 |         |
|           | + cMRPS15 | 1          | 150042.7 | 117780.7 | 142700.0 | <b>132973.2</b> | 14754.7 |
|           |           | 2          | 105806.5 | 120851.8 | 128907.5 |                 |         |
|           |           | 3          | 156729.7 | 125123.7 | 148816.7 |                 |         |

**g. Bicistronic mRNA with IGF1R IRES : LucR activity**

| Condition | Sample    | Experiment | A         | B         | C         | Mean             | SD       |
|-----------|-----------|------------|-----------|-----------|-----------|------------------|----------|
| unt       | Ctrl      | 1          | 2509851.3 | 2513133.7 | 2452448.0 | <b>2593799.6</b> | 492432.2 |
|           |           | 2          | 1757701.3 | 1978385.0 | 2135333.0 |                  |          |
|           |           | 3          | 3156681.7 | 3267478.0 | 3573184.0 |                  |          |
|           | + cMRPS15 | 1          | 2815105.3 | 2750954.0 | 2437360.3 | <b>2754442.2</b> | 391381.6 |
|           |           | 2          | 2340292.7 | 2151969.7 | 2330417.3 |                  |          |
|           |           | 3          | 3379139.0 | 3300914.0 | 3283827.7 |                  |          |
| tm        | Ctrl      | 1          | 1739531.7 | 1731717.0 | 1431858.3 | <b>1841381.4</b> | 408580.1 |
|           |           | 2          | 1451151.5 | 1450547.2 | 1404871.8 |                  |          |
|           |           | 3          | 2451635.0 | 2469095.0 | 2442024.7 |                  |          |
|           | + cMRPS15 | 1          | 2141836.7 | 1733093.0 | 1944261.7 | <b>2029041.5</b> | 312441.1 |
|           |           | 2          | 1561815.8 | 1757877.8 | 1742174.2 |                  |          |
|           |           | 3          | 2654214.3 | 2203373.7 | 2522726.3 |                  |          |

#### h. Bicistronic mRNA with IGF1R IRES : LucF/ LucR ratio

| Condition | Sample    | Experiment | A      | B      | C      | Mean (x100)   | SD     |
|-----------|-----------|------------|--------|--------|--------|---------------|--------|
| unt       | Ctrl      | 1          | 0.0512 | 0.0486 | 0.0484 | <b>0.0439</b> | 0.0045 |
|           |           | 2          | 0.0422 | 0.0439 | 0.0475 |               |        |
|           |           | 3          | 0.0379 | 0.0368 | 0.0384 |               |        |
|           | + cMRPS15 | 1          | 0.0525 | 0.0515 | 0.0455 | <b>0.0476</b> | 0.0032 |
|           |           | 2          | 0.0522 | 0.0485 | 0.0430 |               |        |
|           |           | 3          | 0.0471 | 0.0450 | 0.0430 |               |        |
| tm        | Ctrl      | 1          | 0.0595 | 0.0609 | 0.0662 | <b>0.0585</b> | 0.0052 |
|           |           | 2          | 0.0607 | 0.0592 | 0.0676 |               |        |
|           |           | 3          | 0.0504 | 0.0513 | 0.0506 |               |        |
|           | + cMRPS15 | 1          | 0.0701 | 0.0680 | 0.0734 | <b>0.0663</b> | 0.0054 |
|           |           | 2          | 0.0677 | 0.0687 | 0.0740 |               |        |
|           |           | 3          | 0.0590 | 0.0568 | 0.0590 |               |        |

**i. Bicistronic mRNA with VEGFD IRES : LucF activity**

| Condition | Sample    | Experiment | A        | B        | C        | Mean           | SD      |
|-----------|-----------|------------|----------|----------|----------|----------------|---------|
| unt       | Ctrl      | 1          | 82814.3  | 84593.3  | 93684.3  | <b>61589.2</b> | 13436.6 |
|           |           | 2          | 59241.3  | 61179.3  | 65884.3  |                |         |
|           |           | 3          | 47734.7  | 42754.7  | 50566.7  |                |         |
|           |           | 4          | 46025.0  | 51416.0  | 53176.7  |                |         |
|           | + cMRPS15 | 1          | 72956.0  | 64602.0  | 67981.0  | <b>47919.8</b> | 12877.8 |
|           |           | 2          | 54432.3  | 53884.7  | 50929.3  |                |         |
|           |           | 3          | 38130.3  | 34895.7  | 35855.7  |                |         |
|           |           | 4          | 30489.0  | 35349.7  | 35531.7  |                |         |
| tm        | Ctrl      | 1          | 134000.7 | 142765.3 | 109008.7 | <b>90646.3</b> | 20720.9 |
|           |           | 2          | 96791.3  | 94991.3  | 82296.7  |                |         |
|           |           | 3          | 75487.5  | 75646.5  | 65142.8  |                |         |
|           |           | 4          | 76945.2  | 68590.5  | 66089.5  |                |         |
|           | + cMRPS15 | 1          | 129937.3 | 112369.0 | 114124.0 | <b>80849.1</b> | 22725.2 |
|           |           | 2          | 99947.0  | 84219.3  | 70758.0  |                |         |
|           |           | 3          | 59843.2  | 60071.8  | 52976.5  |                |         |
|           |           | 4          | 64954.2  | 63827.2  | 57161.5  |                |         |

**j. Bicistronic mRNA with VEGFD IRES : LucR activity**

| Condition | Sample    | Experiment | A         | B         | C         | Mean             | SD       |
|-----------|-----------|------------|-----------|-----------|-----------|------------------|----------|
| unt       | Ctrl      | 1          | 2915394.7 | 3098664.0 | 3396357.7 | <b>2324410.8</b> | 460543.3 |
|           |           | 2          | 2420258.0 | 2202914.7 | 2554639.7 |                  |          |
|           |           | 3          | 2007703.0 | 2015707.3 | 2051070.7 |                  |          |
|           |           | 4          | 1680429.7 | 1721852.0 | 1827938.7 |                  |          |
|           | + cMRPS15 | 1          | 2685596.7 | 2491582.3 | 2719482.7 | <b>1912992.6</b> | 460975.1 |
|           |           | 2          | 2212691.3 | 2044759.0 | 2089694.3 |                  |          |
|           |           | 3          | 1639983.7 | 1524923.0 | 1480133.3 |                  |          |
|           |           | 4          | 1217955.7 | 1393440.7 | 1455668.3 |                  |          |
| tm        | Ctrl      | 1          | 1858093.7 | 1855202.3 | 1466665.7 | <b>1362882.6</b> | 237846.6 |
|           |           | 2          | 1591667.7 | 1457804.3 | 1374941.3 |                  |          |
|           |           | 3          | 1247386.3 | 1225042.7 | 1109500.0 |                  |          |
|           |           | 4          | 1121795.7 | 1063435.7 | 983055.7  |                  |          |
|           | + cMRPS15 | 1          | 1637169.7 | 1405105.3 | 1392799.3 | <b>1147486.9</b> | 238753.0 |
|           |           | 2          | 1471253.7 | 1263624.7 | 1112736.3 |                  |          |
|           |           | 3          | 999273.7  | 919031.3  | 875278.3  |                  |          |
|           |           | 4          | 921368.7  | 932948.3  | 839253.3  |                  |          |

k. Bicistronic mRNA with VEGFD IRES : LucF/LucR ratio

| Condition | Sample    | Experiment | A     | B     | C     | Mean  | SD    | Mean (x100)  | SD    |
|-----------|-----------|------------|-------|-------|-------|-------|-------|--------------|-------|
| unt       | Ctrl      | 1          | 0.028 | 0.027 | 0.028 | 0.026 | 0.002 | <b>2.644</b> | 0.205 |
|           |           | 2          | 0.024 | 0.028 | 0.026 |       |       |              |       |
|           |           | 3          | 0.024 | 0.021 | 0.025 |       |       |              |       |
|           |           | 4          | 0.027 | 0.030 | 0.029 |       |       |              |       |
|           | + cMRPS15 | 1          | 0.027 | 0.026 | 0.025 | 0.025 | 0.001 | <b>2.488</b> | 0.093 |
|           |           | 2          | 0.025 | 0.026 | 0.024 |       |       |              |       |
|           |           | 3          | 0.023 | 0.023 | 0.024 |       |       |              |       |
|           |           | 4          | 0.025 | 0.025 | 0.024 |       |       |              |       |
| tm        | Ctrl      | 1          | 0.072 | 0.077 | 0.074 | 0.066 | 0.005 | <b>6.588</b> | 0.497 |
|           |           | 2          | 0.061 | 0.065 | 0.060 |       |       |              |       |
|           |           | 3          | 0.061 | 0.062 | 0.059 |       |       |              |       |
|           |           | 4          | 0.069 | 0.064 | 0.067 |       |       |              |       |
|           | + cMRPS15 | 1          | 0.079 | 0.080 | 0.082 | 0.069 | 0.006 | <b>6.935</b> | 0.573 |
|           |           | 2          | 0.068 | 0.067 | 0.064 |       |       |              |       |
|           |           | 3          | 0.060 | 0.065 | 0.061 |       |       |              |       |
|           |           | 4          | 0.070 | 0.068 | 0.068 |       |       |              |       |



### I. Bicistronic mRNA with a hairpin : LucF activity

| Condition | Sample    | Experiment | A        | B        | C        | Mean            | SD       |
|-----------|-----------|------------|----------|----------|----------|-----------------|----------|
| unt       | Ctrl      | 1          | 271416.3 | 211328.0 | 247233.7 | <b>121922.9</b> | 122772.7 |
|           |           | 2          | 17849.7  | 12818.7  | 15160.7  |                 |          |
|           |           | 3          | 9444.3   | 16654.0  | 11530.0  |                 |          |
|           | + cMRPS15 | 1          | 197213.3 | 346335.3 | 261855.7 | <b>99545.4</b>  | 112615.1 |
|           |           | 2          | 21565.3  | 13481.3  | 16566.3  |                 |          |
|           |           | 3          | 12204.7  | 12340.0  | 14346.7  |                 |          |
| tm        | Ctrl      | 1          | 324817.0 | 280777.7 | 245442.0 | <b>107288.3</b> | 117593.7 |
|           |           | 2          | 21977.3  | 21549.0  | 16820.0  |                 |          |
|           |           | 3          | 13594.8  | 21078.2  | 19538.8  |                 |          |
|           | + cMRPS15 | 1          | 452029.3 | 226456.7 | 192854.3 | <b>108354.6</b> | 121394.8 |
|           |           | 2          | 17462.7  | 23387.0  | 17502.3  |                 |          |
|           |           | 3          | 13307.5  | 15917.2  | 16274.8  |                 |          |

### m. Bicistronic mRNA with a hairpin : LucR activity

| Condition | Sample    | Experiment | A         | B         | C         | Mean             | SD        |
|-----------|-----------|------------|-----------|-----------|-----------|------------------|-----------|
| unt       | Ctrl      | 1          | 9983504.0 | 9762276.7 | 9390271.3 | <b>3214216.5</b> | 3504813.3 |
|           |           | 2          | 695288.3  | 714624.0  | 839212.7  |                  |           |
|           |           | 3          | 495188.7  | 629031.0  | 609596.0  |                  |           |
|           | + cMRPS15 | 1          | 7698981.0 | 7454499.7 | 5930942.0 | <b>2780750.7</b> | 2831593.4 |
|           |           | 2          | 726072.3  | 686454.3  | 759822.3  |                  |           |
|           |           | 3          | 575450.3  | 582235.3  | 612299.3  |                  |           |
| tm        | Ctrl      | 1          | 8452577.3 | 9324106.3 | 8245770.0 | <b>3182010.6</b> | 3661427.1 |
|           |           | 2          | 564971.0  | 499836.3  | 456918.7  |                  |           |
|           |           | 3          | 325398.2  | 346725.2  | 421792.2  |                  |           |
|           | + cMRPS15 | 1          | 7541620.7 | 6832099.0 | 5495442.0 | <b>2505523.6</b> | 2376605.5 |
|           |           | 2          | 494086.7  | 532249.7  | 472121.7  |                  |           |
|           |           | 3          | 383290.5  | 380769.8  | 418032.5  |                  |           |

**n. Bicistronic mRNA with a hairpin : LucF/ LucR ratio**

| Condition  | Sample    | Experiment | A     | B     | C     | Mean  | SD    | Mean (x100)  | SD    |
|------------|-----------|------------|-------|-------|-------|-------|-------|--------------|-------|
| <b>unt</b> | Ctrl      | 1          | 0.027 | 0.022 | 0.026 | 0.030 | 0.009 | <b>2.237</b> | 0.360 |
|            |           | 2          | 0.026 | 0.018 | 0.018 |       |       |              |       |
|            |           | 3          | 0.019 | 0.026 | 0.019 |       |       |              |       |
|            | + cMRPS15 | 1          | 0.026 | 0.046 | 0.044 | 0.028 | 0.008 | <b>2.813</b> | 0.798 |
|            |           | 2          | 0.030 | 0.020 | 0.022 |       |       |              |       |
|            |           | 3          | 0.021 | 0.021 | 0.023 |       |       |              |       |
| <b>tm</b>  | Ctrl      | 1          | 0.038 | 0.030 | 0.030 | 0.041 | 0.007 | <b>4.067</b> | 0.652 |
|            |           | 2          | 0.039 | 0.043 | 0.037 |       |       |              |       |
|            |           | 3          | 0.042 | 0.061 | 0.046 |       |       |              |       |
|            | + cMRPS15 | 1          | 0.060 | 0.033 | 0.035 | 0.040 | 0.006 | <b>4.000</b> | 0.571 |
|            |           | 2          | 0.035 | 0.044 | 0.037 |       |       |              |       |
|            |           | 3          | 0.035 | 0.042 | 0.039 |       |       |              |       |

**o. Bicistronic mRNA with EMCV IRES : LucF activity**

| Condition | Sample    | Experiment | A        | B        | C        | Mean     | SD      |
|-----------|-----------|------------|----------|----------|----------|----------|---------|
| unt       | Ctrl      | 1          | 276116.0 | 300373.0 | 270385.3 | 197070.9 | 54073.5 |
|           |           | 2          | 226086.0 | 218083.3 | 215822.3 |          |         |
|           |           | 3          | 143090.3 | 141096.7 | 135366.3 |          |         |
|           |           | 4          | 143472.0 | 150001.3 | 144957.7 |          |         |
|           | + cMRPS15 | 1          | 234156.0 | 243117.7 | 206244.3 | 177305.1 | 33061.7 |
|           |           | 2          | 206987.7 | 183428.3 | 188266.7 |          |         |
|           |           | 3          | 142691.0 | 138443.0 | 147237.0 |          |         |
|           |           | 4          | 132148.7 | 158426.7 | 146514.0 |          |         |
| tm        | Ctrl      | 1          | 204604.3 | 210760.7 | 160983.7 | 130030.5 | 38372.5 |
|           |           | 2          | 174008.7 | 124069.3 | 127585.3 |          |         |
|           |           | 3          | 91941.8  | 95721.5  | 89518.2  |          |         |
|           |           | 4          | 98377.5  | 87125.2  | 95670.2  |          |         |
|           | + cMRPS15 | 1          | 202261.0 | 171990.3 | 154257.0 | 129126.5 | 26263.4 |
|           |           | 2          | 140945.7 | 133758.7 | 122003.7 |          |         |
|           |           | 3          | 99928.5  | 97587.8  | 84668.5  |          |         |
|           |           | 4          | 118723.5 | 123318.2 | 100075.2 |          |         |

**p. Bicistronic mRNA with EMCV IRES : LucR activity**

| Condition | Sample    | Experiment | A        | B        | C        | Mean            | SD       |
|-----------|-----------|------------|----------|----------|----------|-----------------|----------|
| unt       | Ctrl      | 1          | 737771.7 | 826047.7 | 778817.3 | <b>529513.0</b> | 153967.3 |
|           |           | 2          | 531313.0 | 603988.0 | 622944.0 |                 |          |
|           |           | 3          | 385115.3 | 400423.0 | 379762.7 |                 |          |
|           |           | 4          | 346159.0 | 366412.3 | 375402.0 |                 |          |
|           | + cMRPS15 | 1          | 615802.0 | 680740.0 | 569639.0 | <b>472256.4</b> | 88942.1  |
|           |           | 2          | 502485.0 | 477541.7 | 520983.3 |                 |          |
|           |           | 3          | 376392.3 | 409643.3 | 386047.0 |                 |          |
|           |           | 4          | 357433.7 | 396426.0 | 373943.3 |                 |          |
| tm        | Ctrl      | 1          | 465142.0 | 479308.3 | 372283.7 | <b>297745.3</b> | 94178.1  |
|           |           | 2          | 408792.3 | 306497.3 | 319516.7 |                 |          |
|           |           | 3          | 212853.0 | 224984.7 | 210641.0 |                 |          |
|           |           | 4          | 200143.8 | 181143.5 | 191637.2 |                 |          |
|           | + cMRPS15 | 1          | 419367.0 | 389527.0 | 305729.0 | <b>284161.7</b> | 61356.5  |
|           |           | 2          | 342666.0 | 331658.7 | 272334.3 |                 |          |
|           |           | 3          | 223391.7 | 230672.0 | 198728.7 |                 |          |
|           |           | 4          | 234483.5 | 252780.5 | 208602.2 |                 |          |

**q. Bicistronic mRNA with EMCV IRES : LucF/ LucR ratio**

| Condition | Sample    | Experiment | A     | B     | C     | Mean  | SD    | Mean          | SD    |
|-----------|-----------|------------|-------|-------|-------|-------|-------|---------------|-------|
| unt       | Ctrl      | 1          | 0.374 | 0.364 | 0.347 | 0.376 | 0.022 | <b>37.571</b> | 2.211 |
|           |           | 2          | 0.426 | 0.361 | 0.346 |       |       |               |       |
|           |           | 3          | 0.372 | 0.352 | 0.356 |       |       |               |       |
|           |           | 4          | 0.414 | 0.409 | 0.386 |       |       |               |       |
|           | + cMRPS15 | 1          | 0.380 | 0.357 | 0.362 | 0.376 | 0.016 | <b>37.637</b> | 1.560 |
|           |           | 2          | 0.412 | 0.384 | 0.361 |       |       |               |       |
|           |           | 3          | 0.379 | 0.338 | 0.381 |       |       |               |       |
|           |           | 4          | 0.370 | 0.400 | 0.392 |       |       |               |       |
| tm        | Ctrl      | 1          | 0.440 | 0.440 | 0.432 | 0.441 | 0.025 | <b>44.133</b> | 2.463 |
|           |           | 2          | 0.426 | 0.405 | 0.399 |       |       |               |       |
|           |           | 3          | 0.432 | 0.425 | 0.425 |       |       |               |       |
|           |           | 4          | 0.492 | 0.481 | 0.499 |       |       |               |       |
|           | + cMRPS15 | 1          | 0.482 | 0.442 | 0.505 | 0.455 | 0.031 | <b>45.511</b> | 3.087 |

**Table S9. Effect of MRPS15 overexpression on IRES activities.**

a-b) AC16 cells were transduced with the lentivector overexpressing cMRPS15 and with bicistronic IRES-containing lentivectors (FGF1, IGF1R, VEGFD, EMCV IRESs and hairpin control). MRPS15 expression was measured by capillary electrophoresis, a representative experiment and a histogram showing the mean +/- SEM of 3 independent experiments is shown (Fig. 6b). c-q) IRESs activity was obtained by measuring Firefly/Renilla ratio, for each IRES experiments were performed at least 3 times with 3 biological replicates (n≥9) and IRES activity of MRPS15 overexpression was compared to WT in corresponding conditions (untreated or treated tunicamycin) using a 2way ANOVA test (Fig. 6c).
