# Supplementary material for: Mitochondrial Ribosomal Protein MRPS15 Is a Component of Cytosolic Ribosomes and Regulates Translation in Stressed Cardiomyocytes
Source: MDPI journal article supplement (doi:10.3390/ijms25063250), 2024-03-13
Supplement: s1 [file s1]

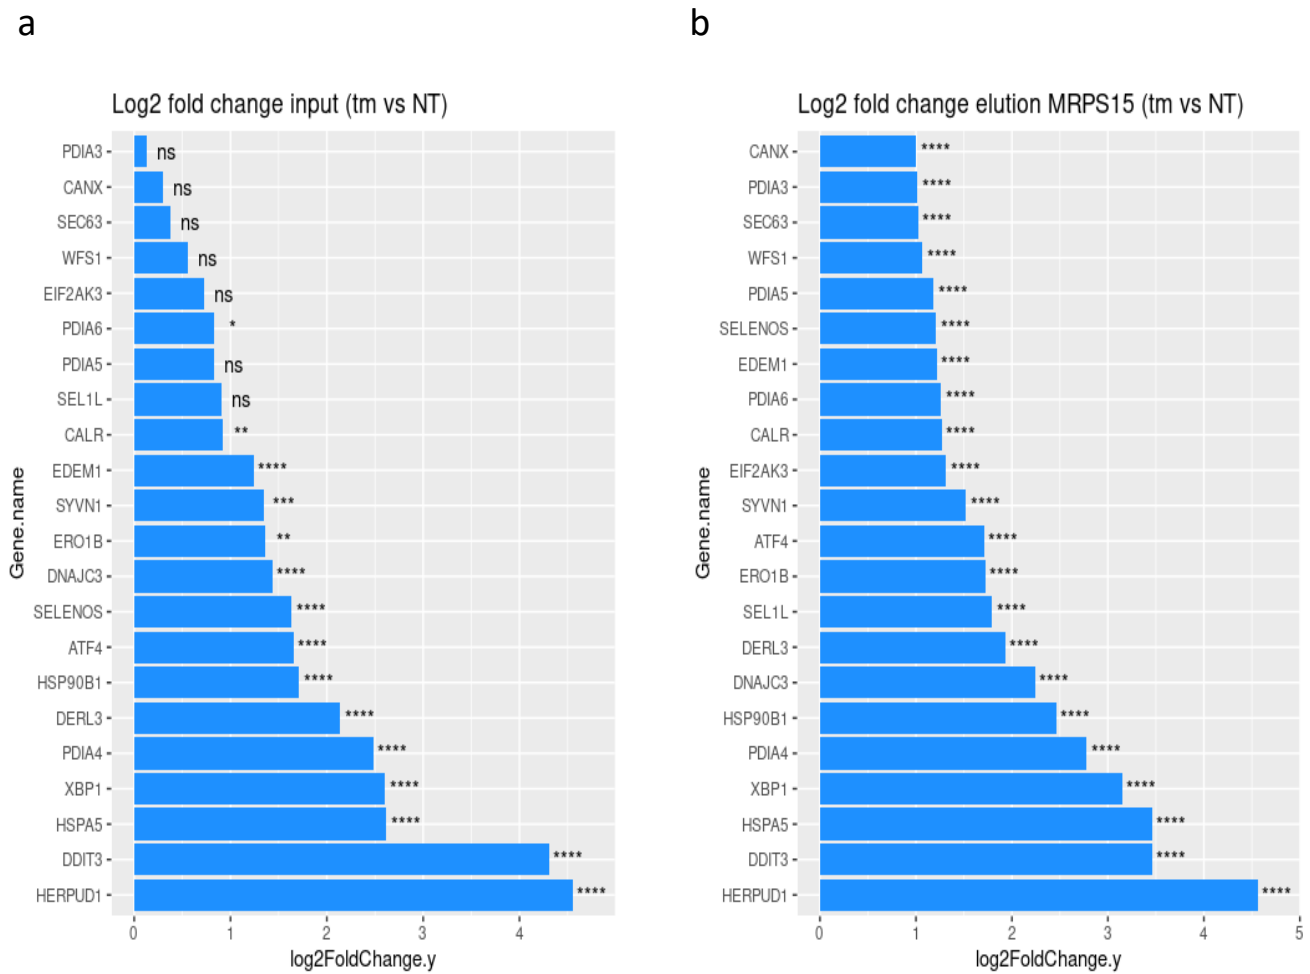

**Figure S2 : mRNA enrichment in polysomes of tm-treated versus untreated cells, with or without MRPS15 immunoprecipitation.**

mRNA fold change of input (a) or MRPS15 elution (b) samples were compared between treated (tm) and untreated (NT) condition and represented in histograms. Data represent at least 3 independent biological replicates for each condition; \* $p < 0.05$ , \*\* $p < 0.01$ , \*\*\* $p < 0.001$ , \*\*\*\* $p < 0.0001$ .
