# Supplementary material for: Mitochondrial Ribosomal Protein MRPS15 Is a Component of Cytosolic Ribosomes and Regulates Translation in Stressed Cardiomyocytes
Source: MDPI journal article supplement (doi:10.3390/ijms25063250), 2024-03-13
Supplement: s1 [file s1]

**a. LucF activity in untreated condition**

| <b>Time</b>   | <b>Experiment</b> | <b>A</b>  | <b>B</b>  | <b>C</b>  | <b>Mean</b> | <b>SD</b> | <b>Mean</b>      | <b>SD</b> |
|---------------|-------------------|-----------|-----------|-----------|-------------|-----------|------------------|-----------|
| <b>0 hr</b>   | 1                 | 601244.2  | 534885.5  | 549595.8  | 561908.5    | 34850.7   | <b>992859.8</b>  | 316484.1  |
|               | 2                 | 1025826.8 | 1044155.5 | 861535.5  | 977172.6    | 100563.1  |                  |           |
|               | 3                 | 1443391.2 | 1377012.2 | 1498091.8 | 1439498.4   | 60633.6   |                  |           |
| <b>30 min</b> | 1                 | 640894.5  | 616499.0  | 713484.8  | 656959.4    | 50449.2   | <b>1050940.1</b> | 308453.2  |
|               | 2                 | 1057663.5 | 1004997.5 | 890785.5  | 984482.2    | 85309.6   |                  |           |
|               | 3                 | 1504549.5 | 1430436.0 | 1599150.8 | 1511378.8   | 84564.5   |                  |           |
| <b>1 hr</b>   | 1                 | 599923.0  | 705601.5  | 663877.5  | 656467.3    | 53227.5   | <b>1141165.4</b> | 350661.1  |
|               | 2                 | 1411343.0 | 1017284.8 | 1154239.8 | 1194289.2   | 200058.6  |                  |           |
|               | 3                 | 1599517.0 | 1420691.2 | 1698010.8 | 1572739.7   | 140585.6  |                  |           |
| <b>2 hr</b>   | 1                 | 729739.5  | 730748.8  | 723267.5  | 727918.6    | 4059.5    | <b>1177149.7</b> | 313706.4  |
|               | 2                 | 1113164.2 | 1266653.2 | 1403928.5 | 1261248.6   | 145457.5  |                  |           |
|               | 3                 | 1354570.5 | 1644323.2 | 1627951.8 | 1542281.8   | 162768.7  |                  |           |
| <b>4 hr</b>   | 1                 | 810873.8  | 693798.2  | 771328.5  | 758666.8    | 59556.0   | <b>1386519.1</b> | 418568.2  |
|               | 2                 | 1698900.0 | 1502423.0 | 1715199.7 | 1638840.9   | 118422.1  |                  |           |
|               | 3                 | 1758892.5 | 1789613.5 | 1737642.8 | 1762049.6   | 26128.8   |                  |           |
| <b>6 hr</b>   | 1                 | 562260.0  | 499632.7  | 474672.3  | 512188.3    | 45123.5   | <b>1247402.9</b> | 490143.0  |
|               | 2                 | 1765272.7 | 1781636.0 | 1818734.7 | 1788547.8   | 27393.0   |                  |           |
|               | 3                 | 1424165.0 | 1366460.7 | 1533792.0 | 1441472.6   | 84997.7   |                  |           |
| <b>8 hr</b>   | 1                 | 481132.0  | 506849.7  | 470922.7  | 486301.4    | 18513.0   | <b>1269974.8</b> | 522448.9  |
|               | 2                 | 1848688.0 | 1937322.3 | 1868450.7 | 1884820.3   | 46529.4   |                  |           |
|               | 3                 | 1360454.7 | 1398798.0 | 1557155.0 | 1438802.6   | 104273.8  |                  |           |
| <b>16 hr</b>  | 1                 | 521239.7  | 568662.0  | 566892.0  | 552264.6    | 26882.9   | <b>1132800.6</b> | 387024.0  |
|               | 2                 | 1593295.2 | 1596525.8 | 1223091.2 | 1470970.7   | 214676.1  |                  |           |
|               | 3                 | 1410000.3 | 1404281.0 | 1311218.3 | 1375166.6   | 55454.6   |                  |           |

**b. LucR activity in untreated condition**

| Time          | Experiment | A          | B          | C          | Mean       | SD        | Mean              | SD        |
|---------------|------------|------------|------------|------------|------------|-----------|-------------------|-----------|
| <b>0 hr</b>   | 1          | 9185735.8  | 7879593.5  | 8580291.2  | 8548540.2  | 653649.8  | <b>17289148.6</b> | 5827072.3 |
|               | 2          | 22667079.5 | 22121995.5 | 21020088.8 | 21936387.9 | 839036.5  |                   |           |
|               | 3          | 21356100.7 | 21408528.5 | 21382924.0 | 21382517.7 | 26216.3   |                   |           |
| <b>30 min</b> | 1          | 10294485.8 | 9744622.0  | 10607055.8 | 10215387.9 | 436623.9  | <b>18029453.3</b> | 5209376.9 |
|               | 2          | 23429258.8 | 21272426.5 | 21584523.5 | 22095402.9 | 1165645.7 |                   |           |
|               | 3          | 21496904.0 | 21035851.0 | 22799952.0 | 21777569.0 | 914927.7  |                   |           |
| <b>1 hr</b>   | 1          | 9667019.5  | 10910749.5 | 10895303.2 | 10491024.1 | 713650.7  | <b>19418768.4</b> | 5951829.6 |
|               | 2          | 26172635.0 | 24149804.2 | 25209418.2 | 25177285.8 | 1011798.2 |                   |           |
|               | 3          | 23226380.0 | 20574263.3 | 23963343.0 | 22587995.4 | 1782446.7 |                   |           |
| <b>2 hr</b>   | 1          | 11348097.8 | 11537082.8 | 11593910.8 | 11493030.5 | 128691.4  | <b>19499104.4</b> | 5475921.5 |
|               | 2          | 24300999.5 | 25917380.5 | 24695930.2 | 24971436.7 | 842674.2  |                   |           |
|               | 3          | 18875679.3 | 23413825.7 | 23809033.3 | 22032846.1 | 2741317.9 |                   |           |
| <b>4 hr</b>   | 1          | 12510770.5 | 12051206.5 | 11864812.2 | 12142263.1 | 332466.6  | <b>21580466.3</b> | 6292135.5 |
|               | 2          | 26812450.3 | 26232091.3 | 29181422.3 | 27408654.7 | 1562444.6 |                   |           |
|               | 3          | 24549207.7 | 26181068.0 | 24841168.0 | 25190481.2 | 870205.1  |                   |           |
| <b>6 hr</b>   | 1          | 10591288.0 | 10426924.7 | 9853200.0  | 10290470.9 | 387502.5  | <b>20989324.1</b> | 7132568.8 |
|               | 2          | 29771388.0 | 29980437.0 | 30703271.7 | 30151698.9 | 488978.3  |                   |           |
|               | 3          | 21548339.0 | 21895102.7 | 24133966.3 | 22525802.7 | 1403461.5 |                   |           |
| <b>8 hr</b>   | 1          | 9688488.0  | 10764851.0 | 9346467.0  | 9933268.7  | 740196.9  | <b>21400306.7</b> | 7644692.0 |
|               | 2          | 29118077.0 | 31543805.7 | 31121479.0 | 30594453.9 | 1295899.9 |                   |           |
|               | 3          | 22911251.0 | 23297957.7 | 24810383.7 | 23673197.4 | 1003633.3 |                   |           |
| <b>16 hr</b>  | 1          | 10999158.7 | 10487104.7 | 10776834.7 | 10754366.0 | 256765.4  | <b>20111423.1</b> | 6238038.1 |
|               | 2          | 25894825.0 | 27553709.7 | 24664644.7 | 26037726.4 | 1449824.0 |                   |           |
|               | 3          | 23424593.0 | 23539252.3 | 23662685.3 | 23542176.9 | 119073.1  |                   |           |

c. LucF/ LucR ratio in untreated condition

| Time   | Experiment | A     | B     | C     | Mean  | SD    | Mean  | SD    | Mean  | SD    |
|--------|------------|-------|-------|-------|-------|-------|-------|-------|-------|-------|
| 0 hr   | 1          | 0.065 | 0.068 | 0.064 | 0.066 | 0.002 | 0.055 | 0.012 | 5.514 | 1.191 |
|        | 2          | 0.045 | 0.047 | 0.041 | 0.044 | 0.003 |       |       |       |       |
|        | 3          | 0.068 | 0.064 | 0.070 | 0.067 | 0.003 |       |       |       |       |
| 30 min | 1          | 0.062 | 0.063 | 0.067 | 0.064 | 0.003 | 0.054 | 0.011 | 5.441 | 1.109 |
|        | 2          | 0.045 | 0.047 | 0.041 | 0.045 | 0.003 |       |       |       |       |
|        | 3          | 0.070 | 0.068 | 0.070 | 0.069 | 0.001 |       |       |       |       |
| 1 hr   | 1          | 0.062 | 0.065 | 0.061 | 0.063 | 0.002 | 0.055 | 0.009 | 5.492 | 0.928 |
|        | 2          | 0.054 | 0.042 | 0.046 | 0.047 | 0.006 |       |       |       |       |
|        | 3          | 0.069 | 0.069 | 0.071 | 0.070 | 0.001 |       |       |       |       |
| 2 hr   | 1          | 0.064 | 0.063 | 0.062 | 0.063 | 0.001 | 0.057 | 0.008 | 5.693 | 0.792 |
|        | 2          | 0.046 | 0.049 | 0.057 | 0.051 | 0.006 |       |       |       |       |
|        | 3          | 0.072 | 0.070 | 0.068 | 0.070 | 0.002 |       |       |       |       |
| 4 hr   | 1          | 0.065 | 0.058 | 0.065 | 0.062 | 0.004 | 0.061 | 0.004 | 6.113 | 0.365 |
|        | 2          | 0.063 | 0.057 | 0.059 | 0.060 | 0.003 |       |       |       |       |
|        | 3          | 0.072 | 0.068 | 0.070 | 0.070 | 0.002 |       |       |       |       |
| 6 hr   | 1          | 0.053 | 0.048 | 0.048 | 0.050 | 0.003 | 0.055 | 0.006 | 5.452 | 0.557 |
|        | 2          | 0.059 | 0.059 | 0.059 | 0.059 | 0.000 |       |       |       |       |
|        | 3          | 0.066 | 0.062 | 0.064 | 0.064 | 0.002 |       |       |       |       |
| 8 hr   | 1          | 0.050 | 0.047 | 0.050 | 0.049 | 0.002 | 0.055 | 0.007 | 5.535 | 0.708 |
|        | 2          | 0.063 | 0.061 | 0.060 | 0.062 | 0.002 |       |       |       |       |
|        | 3          | 0.059 | 0.060 | 0.063 | 0.061 | 0.002 |       |       |       |       |
| 16 hr  | 1          | 0.047 | 0.054 | 0.053 | 0.051 | 0.004 | 0.054 | 0.005 | 5.388 | 0.524 |
|        | 2          | 0.062 | 0.058 | 0.050 | 0.056 | 0.006 |       |       |       |       |
|        | 3          | 0.060 | 0.060 | 0.055 | 0.058 | 0.003 |       |       |       |       |

**d. LucF activity in tunicamycin-treated condition**

| Time          | Experiment | A         | B         | C         | Mean      | SD       | Mean             | SD       |
|---------------|------------|-----------|-----------|-----------|-----------|----------|------------------|----------|
| <b>0 hr</b>   | 1          | 601244.2  | 534885.5  | 549595.8  | 561908.5  | 34850.7  | <b>992859.8</b>  | 316484.1 |
|               | 2          | 1025826.8 | 1044155.5 | 861535.5  | 977172.6  | 100563.1 |                  |          |
|               | 3          | 1443391.2 | 1377012.2 | 1498091.8 | 1439498.4 | 60633.6  |                  |          |
| <b>30 min</b> | 1          | 577832.2  | 629007.0  | 585059.2  | 597299.4  | 27696.3  | <b>1052039.6</b> | 337038.8 |
|               | 2          | 1264769.8 | 899585.5  | 1071991.8 | 1078782.4 | 182686.8 |                  |          |
|               | 3          | 1405970.8 | 1458138.5 | 1576001.8 | 1480037.1 | 87105.1  |                  |          |
| <b>1 hr</b>   | 1          | 622262.0  | 630447.2  | 612729.5  | 621812.9  | 8867.4   | <b>1091969.3</b> | 325608.7 |
|               | 2          | 1270410.5 | 1037199.2 | 1262080.5 | 1189896.7 | 132305.5 |                  |          |
|               | 3          | 1397949.0 | 1518652.8 | 1475992.8 | 1464198.2 | 61210.2  |                  |          |
| <b>2 hr</b>   | 1          | 481132.0  | 506849.7  | 470922.7  | 486301.4  | 18513.0  | <b>1152579.0</b> | 444185.0 |
|               | 2          | 1298972.2 | 1473610.2 | 1339992.5 | 1370858.3 | 91318.8  |                  |          |
|               | 3          | 1508018.2 | 1692219.8 | 1601493.8 | 1600577.3 | 92104.3  |                  |          |
| <b>4 hr</b>   | 1          | 790249.8  | 602737.5  | 595327.8  | 662771.7  | 110461.4 | <b>1377179.3</b> | 476271.7 |
|               | 2          | 1728486.0 | 1659576.0 | 1681873.7 | 1689978.6 | 35162.7  |                  |          |
|               | 3          | 1800019.5 | 1799203.2 | 1737139.8 | 1778787.5 | 36070.2  |                  |          |
| <b>6 hr</b>   | 1          | 498812.3  | 441356.3  | 490051.0  | 476739.9  | 30954.6  | <b>1270003.1</b> | 528842.2 |
|               | 2          | 1700196.3 | 1860079.3 | 2047234.7 | 1869170.1 | 173697.7 |                  |          |
|               | 3          | 1457490.7 | 1421321.7 | 1513486.0 | 1464099.4 | 46436.2  |                  |          |
| <b>8 hr</b>   | 1          | 425337.7  | 393006.7  | 373172.3  | 397172.2  | 26331.0  | <b>1192632.9</b> | 534336.3 |
|               | 2          | 1707848.0 | 1912179.0 | 1805489.0 | 1808505.3 | 102198.9 |                  |          |
|               | 3          | 1174501.3 | 1483493.3 | 1458668.3 | 1372221.0 | 171679.6 |                  |          |
| <b>16 hr</b>  | 1          | 522393.2  | 484535.5  | 442786.5  | 483238.4  | 39819.2  | <b>691050.3</b>  | 145727.6 |
|               | 2          | 918053.8  | 830863.8  | 923647.5  | 890855.1  | 52029.1  |                  |          |
|               | 3          | 658711.7  | 712375.0  | 726085.7  | 699057.4  | 35606.6  |                  |          |

**e. LucR activity in tunicamycin-treated condition**

| Time          | Experiment | A          | B          | C          | Mean       | SD        | Mean              | SD        |
|---------------|------------|------------|------------|------------|------------|-----------|-------------------|-----------|
| <b>0 hr</b>   | 1          | 9185735.8  | 7879593.5  | 8580291.2  | 8548540.2  | 653649.8  | <b>17289148.6</b> | 5827072.3 |
|               | 2          | 22667079.5 | 22121995.5 | 21020088.8 | 21936387.9 | 839036.5  |                   |           |
|               | 3          | 21356100.7 | 21408528.5 | 21382924.0 | 21382517.7 | 26216.3   |                   |           |
| <b>30 min</b> | 1          | 9922533.8  | 10229378.5 | 10424279.5 | 10192063.9 | 252945.6  | <b>18872204.1</b> | 5786760.1 |
|               | 2          | 25970134.8 | 22263989.5 | 24831936.2 | 24355353.5 | 1898480.1 |                   |           |
|               | 3          | 21211819.7 | 21432298.5 | 23563466.3 | 22069194.8 | 1298764.1 |                   |           |
| <b>1 hr</b>   | 1          | 10819362.5 | 11192227.2 | 11186717.2 | 11066102.3 | 213700.7  | <b>19625564.4</b> | 5706308.1 |
|               | 2          | 25291560.5 | 25297793.8 | 25526334.5 | 25371896.3 | 133783.7  |                   |           |
|               | 3          | 22045784.5 | 22469365.0 | 22800934.3 | 22438694.6 | 378508.0  |                   |           |
| <b>2 hr</b>   | 1          | 10672629.3 | 9425847.3  | 8631733.3  | 9576736.7  | 1028780.7 | <b>18597035.7</b> | 6013532.7 |
|               | 2          | 25404842.2 | 25943573.8 | 24164444.5 | 25170953.5 | 912333.9  |                   |           |
|               | 3          | 18946629.0 | 22767159.3 | 21416462.7 | 21043417.0 | 1937391.4 |                   |           |
| <b>4 hr</b>   | 1          | 9157618.2  | 8874163.2  | 8352043.5  | 8794608.3  | 408637.2  | <b>16568256.2</b> | 5182431.9 |
|               | 2          | 22566264.0 | 21722719.3 | 22465246.3 | 22251409.9 | 460637.0  |                   |           |
|               | 3          | 19302674.7 | 19236560.3 | 17437016.0 | 18658750.3 | 1058569.3 |                   |           |
| <b>6 hr</b>   | 1          | 5707557.7  | 6468723.3  | 6793851.3  | 6323377.4  | 557541.5  | <b>13643456.2</b> | 4880052.5 |
|               | 2          | 18797739.3 | 19533741.3 | 22025645.7 | 20119042.1 | 1691678.9 |                   |           |
|               | 3          | 14580117.7 | 14335709.3 | 14548020.3 | 14487949.1 | 132816.7  |                   |           |
| <b>8 hr</b>   | 1          | 4929376.3  | 4938396.0  | 4512184.3  | 4793318.9  | 243511.4  | <b>11156299.3</b> | 4385073.4 |
|               | 2          | 15530515.3 | 18023923.0 | 17064235.7 | 16872891.3 | 1257668.5 |                   |           |
|               | 3          | 10512410.0 | 12480250.0 | 12415403.0 | 11802687.7 | 1117883.5 |                   |           |
| <b>16 hr</b>  | 1          | 3249819.8  | 3223857.8  | 2744256.2  | 3072644.6  | 284688.8  | <b>4561899.3</b>  | 992836.5  |
|               | 2          | 5896815.2  | 5583069.5  | 5932838.5  | 5804241.1  | 192385.2  |                   |           |
|               | 3          | 4691651.3  | 4763560.7  | 4971224.7  | 4808812.2  | 145176.1  |                   |           |

**f. LucF/ LucR ratio in tunicamycin-treated condition**

| Time          | Experiment | A     | B     | C     | Mean  | SD    | Mean  | SD    | Mean          | SD    |
|---------------|------------|-------|-------|-------|-------|-------|-------|-------|---------------|-------|
| <b>0 hr</b>   | 1          | 0.065 | 0.068 | 0.064 | 0.066 | 0.002 | 0.055 | 0.012 | <b>5.514</b>  | 1.191 |
|               | 2          | 0.045 | 0.047 | 0.041 | 0.044 | 0.003 |       |       |               |       |
|               | 3          | 0.068 | 0.064 | 0.070 | 0.067 | 0.003 |       |       |               |       |
| <b>30 min</b> | 1          | 0.058 | 0.061 | 0.056 | 0.059 | 0.003 | 0.051 | 0.009 | <b>5.135</b>  | 0.856 |
|               | 2          | 0.049 | 0.040 | 0.043 | 0.044 | 0.004 |       |       |               |       |
|               | 3          | 0.066 | 0.068 | 0.067 | 0.067 | 0.001 |       |       |               |       |
| <b>1 hr</b>   | 1          | 0.058 | 0.056 | 0.055 | 0.056 | 0.001 | 0.052 | 0.006 | <b>5.155</b>  | 0.610 |
|               | 2          | 0.050 | 0.041 | 0.049 | 0.047 | 0.005 |       |       |               |       |
|               | 3          | 0.063 | 0.068 | 0.065 | 0.065 | 0.002 |       |       |               |       |
| <b>2 hr</b>   | 1          | 0.045 | 0.054 | 0.055 | 0.051 | 0.005 | 0.053 | 0.004 | <b>5.280</b>  | 0.423 |
|               | 2          | 0.051 | 0.057 | 0.055 | 0.054 | 0.003 |       |       |               |       |
|               | 3          | 0.080 | 0.074 | 0.075 | 0.076 | 0.003 |       |       |               |       |
| <b>4 hr</b>   | 1          | 0.086 | 0.068 | 0.071 | 0.075 | 0.010 | 0.076 | 0.006 | <b>7.556</b>  | 0.623 |
|               | 2          | 0.077 | 0.076 | 0.075 | 0.076 | 0.001 |       |       |               |       |
|               | 3          | 0.093 | 0.094 | 0.100 | 0.095 | 0.004 |       |       |               |       |
| <b>6 hr</b>   | 1          | 0.087 | 0.068 | 0.072 | 0.076 | 0.010 | 0.084 | 0.011 | <b>8.440</b>  | 1.138 |
|               | 2          | 0.090 | 0.095 | 0.093 | 0.093 | 0.002 |       |       |               |       |
|               | 3          | 0.100 | 0.099 | 0.104 | 0.101 | 0.003 |       |       |               |       |
| <b>8 hr</b>   | 1          | 0.086 | 0.080 | 0.083 | 0.083 | 0.003 | 0.095 | 0.014 | <b>9.507</b>  | 1.363 |
|               | 2          | 0.110 | 0.106 | 0.106 | 0.107 | 0.002 |       |       |               |       |
|               | 3          | 0.112 | 0.119 | 0.117 | 0.116 | 0.004 |       |       |               |       |
| <b>16 h</b>   | 1          | 0.161 | 0.150 | 0.161 | 0.157 | 0.006 | 0.155 | 0.005 | <b>15.543</b> | 0.517 |

**Table S7. Kinetics of IGF1R IRES activity**

Cardiomyocytes AC16 transduced with the bicistronic lentivector with the IGF1R IRES were submitted to tunicamycin treatment and the time-course of IGF1R IRES activity (0 hr, 30 min, 1 hr, 2 hr, 4 hr, 6 hr, 8 hr, 16 hr) was evaluated by measuring Firefly/Renilla ratio. Experiments were performed three times with 3 biological replicates (n=9) and each time point was compared to 0 hr time point with a non parametric Mann-Whitney test (Fig. S1).
