# Supplementary material for: Mitochondrial Ribosomal Protein MRPS15 Is a Component of Cytosolic Ribosomes and Regulates Translation in Stressed Cardiomyocytes
Source: MDPI journal article supplement (doi:10.3390/ijms25063250), 2024-03-13
Supplement: s1 [file s1]

| Experiment 1 | unt   |                 |                |               | tm      |                 |                |               |
|--------------|-------|-----------------|----------------|---------------|---------|-----------------|----------------|---------------|
|              | Image | Number of cells | Number of dots | Dots per cell | Image   | Number of cells | Number of dots | Dots per cell |
|              | 1     | 7               | 136            | 19.4          | 1       | 6               | 332            | 55.3          |
|              | 2     | 5               | 82             | 16.4          | 2       | 11              | 323            | 29.4          |
|              | 3     | 8               | 184            | 23.0          | 3       | 7               | 284            | 40.6          |
|              | 4     | 4               | 117            | 29.3          | 4       | 8               | 373            | 46.6          |
|              | 5     | 9               | 98             | 10.9          | 5       | 14              | 484            | 34.6          |
|              | 6     | 6               | 192            | 32.0          | 6       | 9               | 168            | 18.7          |
|              | 7     | 9               | 148            | 16.4          | 7       | 4               | 300            | 75.0          |
|              | 8     | 5               | 200            | 40.0          | 8       | 6               | 484            | 80.7          |
|              | 9     | 6               | 110            | 18.3          | 9       | 8               | 368            | 46.0          |
|              | 10    | 6               | 68             | 11.3          | 10      | 9               | 991            | 110.1         |
|              | 11    | 6               | 48             | 8.0           | 11      | 8               | 407            | 50.9          |
|              | 12    | 11              | 152            | 13.8          | 12      | 8               | 283            | 35.4          |
|              | Mean  | 82              | 1535           | 19.91         | Mean    | 98              | 4797           | 51.9          |
| Experiment 2 | unt   |                 |                |               | tm      |                 |                |               |
|              | Image | Number of cells | Number of dots | Dots per cell | Image   | Number of cells | Number of dots | Dots per cell |
|              | 1     | 2               | 108            | 54.0          | 7       | 8               | 218            | 27.3          |
|              | 2     | 7               | 134            | 19.1          | 8       | 8               | 238            | 29.8          |
|              | 3     | 7               | 257            | 36.7          | 9       | 7               | 262            | 37.4          |
|              | 4     | 6               | 185            | 30.8          | 10      | 9               | 330            | 36.7          |
|              | 5     | 6               | 283            | 47.2          | 11      | 12              | 496            | 41.3          |
|              | 6     | 8               | 310            | 38.8          | 12      | 11              | 391            | 35.5          |
|              | 7     | 6               | 364            | 60.7          | 13      | 7               | 471            | 67.3          |
|              | 8     | 8               | 313            | 39.1          | 14      | 9               | 452            | 50.2          |
|              | 9     | 8               | 226            | 28.3          | 15      | 7               | 176            | 25.1          |
|              | 10    | 4               | 138            | 34.5          | 16      | 11              | 191            | 17.4          |
|              | 11    | 5               | 177            | 35.4          | 17      | 9               | 182            | 20.2          |
|              | 12    | 7               | 178            | 25.4          | 18      | 8               | 172            | 21.5          |
|              | Mean  | 74              | 2673           | 37.5          | Mean    | 8.8             | 294.1          | 33.9          |
| Experiment 3 | unt   |                 |                |               | tm      |                 |                |               |
|              | Image | Number of cells | Number of dots | Dots per cell | Picture | Number of cells | Number of dots | Dots per cell |
|              | 1     | 5               | 252            | 50.4          | 1       | 5               | 80             | 16.0          |
|              | 2     | 6               | 144            | 24.0          | 2       | 7               | 44             | 6.3           |
|              | 3     | 9               | 172            | 19.1          | 3       | 4               | 66             | 16.5          |
|              | 4     | 5               | 105            | 21.0          | 4       | 5               | 64             | 12.8          |
|              | 5     | 10              | 166            | 16.6          | 5       | 8               | 51             | 6.4           |

|  |      |      |      |      |      |      |      |      |
|--|------|------|------|------|------|------|------|------|
|  | 6    | 5    | 57   | 11.4 | 6    | 5    | 98   | 19.6 |
|  | 7    | 9    | 63   | 7.0  | 7    | 7    | 76   | 10.9 |
|  | 8    | 6    | 75   | 12.5 | 8    | 8    | 60   | 7.5  |
|  | 9    | 9    | 114  | 12.7 | 9    | 3    | 90   | 30.0 |
|  | 10   | 8    | 191  | 23.9 | 10   | 5    | 70   | 14.0 |
|  | 11   | 7    | 162  | 23.1 | 11   | 6    | 74   | 12.3 |
|  | 12   | 7    | 153  | 21.9 | 12   | 6    | 72   | 12.0 |
|  | 13   | 10   | 140  | 14.0 | 13   | 7    | 77   | 11.0 |
|  | 14   | 9    | 49   | 5.4  | 14   | 6    | 70   | 11.7 |
|  | 15   | 5    | 59   | 11.8 | 15   | 6    | 93   | 15.5 |
|  | Mean | 110  | 1654 | 18.3 | Mean | 88   | 1085 | 13.5 |
|  |      | 15.0 |      |      |      | 12.3 |      |      |

|                 |       |                 |                |               |       |                 |                |               |
|-----------------|-------|-----------------|----------------|---------------|-------|-----------------|----------------|---------------|
| Experiment<br>4 | unt   |                 |                |               | tm    |                 |                |               |
|                 | Image | Number of cells | Number of dots | Dots per cell | Image | Number of cells | Number of dots | Dots per cell |
|                 | 1     | 9               | 108            | 12.0          | 1     | 7               | 581            | 83.0          |
|                 | 2     | 6               | 162            | 27.0          | 2     | 5               | 134            | 26.8          |
|                 | 3     | 7               | 143            | 20.4          | 3     | 6               | 159            | 26.5          |
|                 | 4     | 6               | 202            | 33.7          | 4     | 6               | 137            | 22.8          |
|                 | 5     | 7               | 175            | 25.0          | 5     | 6               | 98             | 16.3          |
|                 | 6     | 7               | 88             | 12.6          | 6     | 7               | 116            | 16.6          |
|                 | 7     | 7               | 166            | 23.7          | 7     | 7               | 93             | 13.3          |
|                 | 8     | 11              | 178            | 16.2          | 8     | 7               | 124            | 17.7          |
|                 | 9     | 7               | 171            | 24.4          | 9     | 7               | 157            | 22.4          |
|                 | 10    | 5               | 143            | 28.6          | 10    | 9               | 155            | 17.2          |
|                 | 11    | 6               | 114            | 19.0          | 11    | 8               | 192            | 24.0          |
|                 | 12    | 7               | 114            | 16.3          | 12    | 5               | 289            | 57.8          |
|                 | 13    | 8               | 176            | 22.0          | 13    | 6               | 139            | 23.2          |
|                 | 14    | 5               | 187            | 37.4          | 14    | 4               | 122            | 30.5          |
|                 | 15    | 6               | 214            | 35.7          | 15    | 4               | 183            | 45.8          |
|                 |       |                 |                |               | 16    | 8               | 205            | 25.6          |
|                 |       |                 |                |               | 17    | 8               | 171            | 21.4          |
|                 | Mean  | 104             | 2341           | 21.6          | Mean  | 110             | 3055           | 28.9          |
|                 |       | 22.5            |                |               |       | 27.8            |                |               |

**Table S4. Proximal ligation assay of MRPS15 with RPS7.**

Proximal ligation assay using MRPS15 and RPS7 antibody was performed on unstressed or stressed cells to visualize colocalization of MRPS15 with ribosome. For unbiased analysis dots quantification was performed after applying threshold otsu of ImageJ software and quantification done on 4 independent experiments with at least 12 images per condition and dots number of stressed cells condition was compared to unstressed condition using a non parametric Mann-Whitney test (Fig. 3c).
