# Supplementary material for: Mitochondrial Ribosomal Protein MRPS15 Is a Component of Cytosolic Ribosomes and Regulates Translation in Stressed Cardiomyocytes
Source: MDPI journal article supplement (doi:10.3390/ijms25063250), 2024-03-13
Supplement: s1 [file s1]

**a. MRPS15 quantification on cytosolic extract**

| Sample            | Experiment |          |         |         | Mean           | SD      |
|-------------------|------------|----------|---------|---------|----------------|---------|
|                   | 1          | 2        | 3       | 4       |                |         |
| Input unt         | 74608.1    | 115702.5 | 76231.2 | 72716.3 | <b>84814.5</b> | 15444.0 |
| Input tm          | 103786.3   | 98110.3  | 44773.4 | 77991.4 | <b>81165.4</b> | 19783.0 |
| Normalized by unt |            |          |         |         |                |         |
| Sample            | Experiment |          |         |         | Mean           | SD      |
|                   | 1          | 2        | 3       | 4       |                |         |
| Input unt         | 0.88       | 1.36     | 0.90    | 0.86    | <b>1.00</b>    | 0.21    |
| Input tm          | 1.22       | 1.16     | 0.53    | 0.92    | <b>0.97</b>    | 0.29    |

**b. MRPS15 quantification on cytosolic extract without mitochondria**

| Sample            | Experiment |           |          | Mean            | SD       |
|-------------------|------------|-----------|----------|-----------------|----------|
|                   | 1          | 2         | 3        |                 |          |
| Input unt         | 233986.1   | 1708121.8 | 370668.5 | <b>770925.5</b> | 624797.6 |
| Input tm          | 334023.9   | 2268352.1 | 209904.1 | <b>937426.7</b> | 887283.6 |
| Normalized by unt |            |           |          |                 |          |
| Sample            | Experiment |           |          | Mean            | SD       |
|                   | 1          | 2         | 3        |                 |          |
| Input unt         | 0.30       | 2.22      | 0.48     | <b>1.00</b>     | 0.81     |
| Input tm          | 0.43       | 2.94      | 0.27     | <b>1.22</b>     | 1.15     |

### c. Experiment 1

| Fluorescence intensity |                         |          |                         | Normalized to unt |                         |          |                         |
|------------------------|-------------------------|----------|-------------------------|-------------------|-------------------------|----------|-------------------------|
| unt                    |                         | tm       |                         | unt               |                         | tm       |                         |
| Raw data               | Normalized to cell size | Raw data | Normalized to cell size | Raw data          | Normalized to cell size | Raw data | Normalized to cell size |
| 422.85                 | 867.50                  | 275.21   | 760.59                  | 1.71              | 1.56                    | 1.11     | 1.37                    |
| 424.98                 | 917.91                  | 388.25   | 922.74                  | 1.72              | 1.65                    | 1.57     | 1.66                    |
| 298.36                 | 593.49                  | 465.37   | 1083.35                 | 1.21              | 1.07                    | 1.88     | 1.95                    |
| 328.45                 | 617.06                  | 432.21   | 1019.62                 | 1.33              | 1.11                    | 1.75     | 1.83                    |
| 334.90                 | 722.79                  | 235.19   | 625.37                  | 1.35              | 1.30                    | 0.95     | 1.12                    |
| 250.39                 | 486.74                  | 252.38   | 627.24                  | 1.01              | 0.87                    | 1.02     | 1.13                    |
| 295.02                 | 607.05                  | 302.79   | 677.83                  | 1.19              | 1.09                    | 1.22     | 1.22                    |
| 195.90                 | 427.82                  | 317.90   | 764.83                  | 0.79              | 0.77                    | 1.29     | 1.37                    |
| 207.99                 | 455.17                  | 356.78   | 874.32                  | 0.84              | 0.82                    | 1.44     | 1.57                    |
| 155.90                 | 381.87                  | 273.52   | 629.25                  | 0.63              | 0.69                    | 1.11     | 1.13                    |
| 192.86                 | 469.36                  | 226.34   | 546.54                  | 0.78              | 0.84                    | 0.92     | 0.98                    |
| 215.09                 | 496.54                  | 192.27   | 464.19                  | 0.87              | 0.89                    | 0.78     | 0.83                    |
| 262.91                 | 580.07                  | 307.48   | 623.81                  | 1.06              | 1.04                    | 1.24     | 1.12                    |
| 181.17                 | 397.44                  | 325.84   | 661.58                  | 0.73              | 0.71                    | 1.32     | 1.19                    |
| 219.15                 | 602.49                  | 287.46   | 710.42                  | 0.89              | 1.08                    | 1.16     | 1.28                    |
| 212.51                 | 459.18                  | 286.74   | 722.27                  | 0.86              | 0.82                    | 1.16     | 1.30                    |
| 209.76                 | 494.47                  | 286.16   | 619.71                  | 0.85              | 0.89                    | 1.16     | 1.11                    |
| 280.96                 | 728.33                  | 232.66   | 483.84                  | 1.14              | 1.31                    | 0.94     | 0.87                    |
| 200.70                 | 441.43                  | 283.44   | 612.74                  | 0.81              | 0.79                    | 1.15     | 1.10                    |
| 252.20                 | 592.93                  | 305.00   | 754.96                  | 1.02              | 1.06                    | 1.23     | 1.36                    |
| 267.02                 | 636.76                  | 352.96   | 777.51                  | 1.08              | 1.14                    | 1.43     | 1.40                    |
| 263.54                 | 599.32                  | 268.12   | 623.40                  | 1.07              | 1.08                    | 1.08     | 1.12                    |
| 212.14                 | 474.08                  | 252.38   | 541.46                  | 0.86              | 0.85                    | 1.02     | 0.97                    |
| 283.45                 | 594.43                  | 476.06   | 1002.82                 | 1.15              | 1.07                    | 1.93     | 1.80                    |
| 304.70                 | 597.46                  | 276.08   | 649.69                  | 1.23              | 1.07                    | 1.12     | 1.17                    |
| 273.10                 | 580.04                  | 334.26   | 743.70                  | 1.10              | 1.04                    | 1.35     | 1.34                    |
| 252.51                 | 625.01                  | 376.64   | 977.02                  | 1.02              | 1.12                    | 1.52     | 1.75                    |
| 290.67                 | 650.01                  | 300.31   | 622.72                  | 1.18              | 1.17                    | 1.21     | 1.12                    |
| 182.37                 | 417.72                  | 277.35   | 662.40                  | 0.74              | 0.75                    | 1.12     | 1.19                    |
| 212.40                 | 471.57                  | 255.02   | 519.29                  | 0.86              | 0.85                    | 1.03     | 0.93                    |
| 228.83                 | 563.65                  | 280.74   | 635.50                  | 0.93              | 1.01                    | 1.14     | 1.14                    |
| 183.02                 | 405.65                  | 209.32   | 480.62                  | 0.74              | 0.73                    | 0.85     | 0.86                    |
| 200.13                 | 466.80                  | 152.55   | 394.58                  | 0.81              | 0.84                    | 0.62     | 0.71                    |
| 254.16                 | 611.24                  | 217.62   | 509.44                  | 1.03              | 1.10                    | 0.88     | 0.91                    |
| 230.22                 | 603.81                  | 231.70   | 504.28                  | 0.93              | 1.08                    | 0.94     | 0.91                    |
| 308.52                 | 766.65                  | 243.99   | 528.59                  | 1.25              | 1.38                    | 0.99     | 0.95                    |
| 178.01                 | 439.79                  | 365.92   | 847.87                  | 0.72              | 0.79                    | 1.48     | 1.52                    |
| 325.16                 | 690.02                  | 151.57   | 575.13                  | 1.32              | 1.24                    | 0.61     | 1.03                    |
| 187.13                 | 434.21                  | 246.45   | 709.65                  | 0.76              | 0.78                    | 1.00     | 1.27                    |
| 265.15                 | 625.02                  | 270.05   | 654.20                  | 1.07              | 1.12                    | 1.09     | 1.17                    |
| 332.52                 | 697.61                  | 154.86   | 565.90                  | 1.34              | 1.25                    | 0.63     | 1.02                    |

|        |        |        |         |      |      |      |      |
|--------|--------|--------|---------|------|------|------|------|
| 266.02 | 598.75 | 317.52 | 847.18  | 1.08 | 1.08 | 1.28 | 1.52 |
| 366.73 | 674.03 | 222.92 | 482.02  | 1.48 | 1.21 | 0.90 | 0.87 |
| 208.71 | 464.27 | 278.08 | 594.76  | 0.84 | 0.83 | 1.12 | 1.07 |
| 211.25 | 514.43 | 337.27 | 714.59  | 0.85 | 0.92 | 1.36 | 1.28 |
| 186.66 | 441.67 | 268.03 | 582.65  | 0.75 | 0.79 | 1.08 | 1.05 |
| 253.30 | 625.41 | 286.87 | 620.91  | 1.02 | 1.12 | 1.16 | 1.12 |
| 215.86 | 580.82 | 191.29 | 496.78  | 0.87 | 1.04 | 0.77 | 0.89 |
| 183.10 | 426.73 | 314.63 | 705.66  | 0.74 | 0.77 | 1.27 | 1.27 |
| 209.20 | 477.43 | 209.75 | 495.98  | 0.85 | 0.86 | 0.85 | 0.89 |
| 132.65 | 301.74 | 221.97 | 544.09  | 0.54 | 0.54 | 0.90 | 0.98 |
|        |        | 256.82 | 555.26  |      |      | 1.04 | 1.00 |
|        |        | 197.48 | 436.71  |      |      | 0.80 | 0.78 |
|        |        | 348.02 | 1021.58 |      |      | 1.41 | 1.83 |
|        |        | 290.67 | 703.03  |      |      | 1.18 | 1.26 |
|        |        | 347.25 | 798.35  |      |      | 1.40 | 1.43 |
|        |        | 308.25 | 771.78  |      |      | 1.25 | 1.39 |
|        |        | 272.83 | 684.32  |      |      | 1.10 | 1.23 |
|        |        | 329.25 | 717.81  |      |      | 1.33 | 1.29 |
|        |        | 260.44 | 742.06  |      |      | 1.05 | 1.33 |
|        |        | 246.15 | 586.87  |      |      | 1.00 | 1.05 |
|        |        | 370.03 | 925.66  |      |      | 1.50 | 1.66 |
| Mean   |        | Mean   |         | Mean |      | Mean |      |
| 247.26 | 556.78 | 283.91 | 673.21  | 1.00 | 1.00 | 1.15 | 1.21 |

#### d. Experiment 2

| Fluorescence intensity |                         |          |                         | Normalized to unt |                         |          |                         |
|------------------------|-------------------------|----------|-------------------------|-------------------|-------------------------|----------|-------------------------|
| unt                    |                         | tm       |                         | unt               |                         | tm       |                         |
| Raw data               | Normalized to cell size | Raw data | Normalized to cell size | Raw data          | Normalized to cell size | Raw data | Normalized to cell size |
| 488.63                 | 968.46                  | 357.19   | 750.39                  | 1.13              | 1.06                    | 0.83     | 0.82                    |
| 453.43                 | 888.40                  | 275.84   | 587.79                  | 1.05              | 0.97                    | 0.64     | 0.64                    |
| 410.16                 | 810.96                  | 272.05   | 580.75                  | 0.95              | 0.88                    | 0.63     | 0.63                    |
| 364.62                 | 791.15                  | 369.85   | 782.81                  | 0.84              | 0.86                    | 0.86     | 0.85                    |
| 411.38                 | 806.01                  | 283.85   | 638.86                  | 0.95              | 0.88                    | 0.66     | 0.70                    |
| 394.19                 | 832.58                  | 270.14   | 558.84                  | 0.91              | 0.91                    | 0.62     | 0.61                    |
| 339.37                 | 726.64                  | 293.53   | 641.52                  | 0.78              | 0.79                    | 0.68     | 0.70                    |
| 598.75                 | 1121.51                 | 272.02   | 642.61                  | 1.38              | 1.22                    | 0.63     | 0.70                    |
| 344.55                 | 731.63                  | 169.06   | 417.86                  | 0.80              | 0.80                    | 0.39     | 0.46                    |
| 385.84                 | 862.84                  | 209.16   | 477.95                  | 0.89              | 0.94                    | 0.48     | 0.52                    |
| 401.56                 | 898.90                  | 308.36   | 751.60                  | 0.93              | 0.98                    | 0.71     | 0.82                    |
| 355.47                 | 758.97                  | 262.90   | 609.94                  | 0.82              | 0.83                    | 0.61     | 0.67                    |
| 320.40                 | 674.85                  | 314.23   | 609.11                  | 0.74              | 0.74                    | 0.73     | 0.66                    |
| 308.14                 | 689.89                  | 307.49   | 598.68                  | 0.71              | 0.75                    | 0.71     | 0.65                    |
| 346.69                 | 656.05                  | 376.58   | 879.40                  | 0.80              | 0.72                    | 0.87     | 0.96                    |
| 385.40                 | 740.86                  | 401.71   | 997.24                  | 0.89              | 0.81                    | 0.93     | 1.09                    |

|        |         |        |         |      |      |      |      |
|--------|---------|--------|---------|------|------|------|------|
| 330.17 | 662.08  | 331.17 | 721.81  | 0.76 | 0.72 | 0.77 | 0.79 |
| 390.02 | 775.41  | 419.09 | 945.99  | 0.90 | 0.85 | 0.97 | 1.03 |
| 513.22 | 989.58  | 245.28 | 645.79  | 1.19 | 1.08 | 0.57 | 0.70 |
| 358.52 | 775.02  | 318.42 | 641.40  | 0.83 | 0.85 | 0.74 | 0.70 |
| 222.28 | 521.71  | 336.62 | 745.05  | 0.51 | 0.57 | 0.78 | 0.81 |
| 340.26 | 725.79  | 400.39 | 823.08  | 0.79 | 0.79 | 0.93 | 0.90 |
| 303.21 | 672.86  | 342.76 | 896.56  | 0.70 | 0.73 | 0.79 | 0.98 |
| 262.99 | 646.53  | 315.83 | 743.75  | 0.61 | 0.70 | 0.73 | 0.81 |
| 393.99 | 957.38  | 526.04 | 980.88  | 0.91 | 1.04 | 1.22 | 1.07 |
| 291.27 | 707.04  | 435.13 | 855.89  | 0.67 | 0.77 | 1.01 | 0.93 |
| 196.01 | 614.80  | 340.44 | 729.80  | 0.45 | 0.67 | 0.79 | 0.80 |
| 347.23 | 722.21  | 378.35 | 800.41  | 0.80 | 0.79 | 0.88 | 0.87 |
| 552.32 | 1169.48 | 398.12 | 1027.02 | 1.28 | 1.28 | 0.92 | 1.12 |
| 479.66 | 1043.25 | 374.13 | 881.68  | 1.11 | 1.14 | 0.87 | 0.96 |
| 311.19 | 674.72  | 729.45 | 1727.79 | 0.72 | 0.74 | 1.69 | 1.88 |
| 300.48 | 718.10  | 536.49 | 1130.03 | 0.70 | 0.78 | 1.24 | 1.23 |
| 340.56 | 741.82  | 343.56 | 746.68  | 0.79 | 0.81 | 0.79 | 0.81 |
| 385.34 | 792.23  | 479.89 | 1078.27 | 0.89 | 0.86 | 1.11 | 1.18 |
| 397.08 | 852.98  | 459.01 | 1066.33 | 0.92 | 0.93 | 1.06 | 1.16 |
| 460.94 | 1009.81 | 435.10 | 1129.56 | 1.07 | 1.10 | 1.01 | 1.23 |
| 322.25 | 652.97  | 405.15 | 868.74  | 0.75 | 0.71 | 0.94 | 0.95 |
| 344.35 | 829.07  | 347.14 | 756.66  | 0.80 | 0.90 | 0.80 | 0.83 |
| 312.50 | 599.35  | 451.57 | 1071.74 | 0.72 | 0.65 | 1.04 | 1.17 |
| 537.89 | 1010.99 | 685.51 | 1459.05 | 1.24 | 1.10 | 1.59 | 1.59 |
| 435.87 | 951.73  | 440.54 | 931.47  | 1.01 | 1.04 | 1.02 | 1.02 |
| 438.68 | 895.03  | 421.23 | 887.07  | 1.01 | 0.98 | 0.97 | 0.97 |
| 367.10 | 740.82  | 431.76 | 889.07  | 0.85 | 0.81 | 1.00 | 0.97 |
| 392.33 | 832.88  | 416.09 | 906.56  | 0.91 | 0.91 | 0.96 | 0.99 |
| 396.58 | 1071.17 | 362.80 | 733.25  | 0.92 | 1.17 | 0.84 | 0.80 |
| 380.90 | 802.56  | 370.23 | 742.40  | 0.88 | 0.88 | 0.86 | 0.81 |
| 599.37 | 1113.26 | 380.46 | 873.12  | 1.39 | 1.21 | 0.88 | 0.95 |
| 636.87 | 1314.06 | 334.81 | 725.68  | 1.47 | 1.43 | 0.77 | 0.79 |
| 597.97 | 1176.39 | 301.34 | 715.88  | 1.38 | 1.28 | 0.70 | 0.78 |
| 497.17 | 1268.84 | 392.42 | 800.32  | 1.15 | 1.38 | 0.91 | 0.87 |
| 534.11 | 1247.07 | 547.09 | 922.61  | 1.24 | 1.36 | 1.27 | 1.01 |
| 408.65 | 1113.74 | 656.72 | 1486.10 | 0.95 | 1.21 | 1.52 | 1.62 |
| 400.89 | 926.38  | 415.14 | 864.01  | 0.93 | 1.01 | 0.96 | 0.94 |
| 418.09 | 1004.54 | 282.23 | 642.60  | 0.97 | 1.10 | 0.65 | 0.70 |
| 484.36 | 886.33  | 332.59 | 724.14  | 1.12 | 0.97 | 0.77 | 0.79 |
| 461.42 | 882.55  | 322.20 | 622.76  | 1.07 | 0.96 | 0.75 | 0.68 |
| 463.90 | 966.33  | 521.91 | 925.18  | 1.07 | 1.05 | 1.21 | 1.01 |
| 398.54 | 838.97  | 505.53 | 1040.50 | 0.92 | 0.91 | 1.17 | 1.13 |
| 726.13 | 1735.02 | 353.17 | 698.85  | 1.68 | 1.89 | 0.82 | 0.76 |
| 472.34 | 1023.28 | 328.19 | 803.81  | 1.09 | 1.12 | 0.76 | 0.88 |
| 917.46 | 1558.88 |        |         | 2.12 | 1.70 |      |      |
| 576.61 | 1219.41 |        |         | 1.33 | 1.33 |      |      |

|        |         |        |        |      |      |      |      |
|--------|---------|--------|--------|------|------|------|------|
| 626.36 | 1585.23 |        |        | 1.45 | 1.73 |      |      |
| 903.32 | 1525.64 |        |        | 2.09 | 1.66 |      |      |
| 564.23 | 1103.71 |        |        | 1.31 | 1.20 |      |      |
| Mean   |         | Mean   |        | Mean |      | Mean |      |
| 432.33 | 917.06  | 381.58 | 832.24 | 1.00 | 1.00 | 0.88 | 0.91 |

### e. Experiment 3

| Fluorescence intensity |                         |          |                         | Normalized to unt |                         |          |                         |
|------------------------|-------------------------|----------|-------------------------|-------------------|-------------------------|----------|-------------------------|
| unt                    |                         | tm       |                         | unt               |                         | tm       |                         |
| Raw data               | Normalized to cell size | Raw data | Normalized to cell size | Raw data          | Normalized to cell size | Raw data | Normalized to cell size |
| 353.56                 | 1030.68                 | 714.28   | 1503.62                 | 0.88              | 1.22                    | 1.78     | 1.78                    |
| 393.64                 | 987.35                  | 539.14   | 1128.71                 | 0.98              | 1.17                    | 1.35     | 1.34                    |
| 406.21                 | 850.80                  | 440.21   | 929.00                  | 1.01              | 1.01                    | 1.10     | 1.10                    |
| 379.26                 | 867.35                  | 458.12   | 888.92                  | 0.95              | 1.03                    | 1.14     | 1.05                    |
| 363.15                 | 692.18                  | 508.17   | 971.08                  | 0.91              | 0.82                    | 1.27     | 1.15                    |
| 428.23                 | 828.09                  | 534.42   | 1038.24                 | 1.07              | 0.98                    | 1.34     | 1.23                    |
| 373.47                 | 760.16                  | 481.16   | 1024.71                 | 0.93              | 0.90                    | 1.20     | 1.21                    |
| 554.31                 | 1119.22                 | 420.22   | 838.06                  | 1.38              | 1.32                    | 1.05     | 0.99                    |
| 360.69                 | 756.67                  | 463.97   | 866.17                  | 0.90              | 0.90                    | 1.16     | 1.02                    |
| 327.26                 | 665.10                  | 462.04   | 958.77                  | 0.82              | 0.79                    | 1.15     | 1.13                    |
| 271.97                 | 891.02                  | 409.13   | 943.03                  | 0.68              | 1.05                    | 1.02     | 1.12                    |
| 542.09                 | 1056.96                 | 480.46   | 989.05                  | 1.35              | 1.25                    | 1.20     | 1.17                    |
| 505.14                 | 955.92                  | 452.17   | 1179.98                 | 1.26              | 1.13                    | 1.13     | 1.40                    |
| 383.84                 | 817.09                  | 576.65   | 1313.32                 | 0.96              | 0.97                    | 1.44     | 1.55                    |
| 386.87                 | 901.95                  | 624.95   | 1251.57                 | 0.97              | 1.07                    | 1.56     | 1.48                    |
| 495.36                 | 1022.02                 | 491.20   | 1232.75                 | 1.24              | 1.21                    | 1.23     | 1.46                    |
| 309.21                 | 644.95                  | 921.00   | 1786.59                 | 0.77              | 0.76                    | 2.30     | 2.11                    |
| 264.22                 | 522.27                  | 772.95   | 1737.67                 | 0.66              | 0.62                    | 1.93     | 2.06                    |
| 341.74                 | 689.01                  | 463.49   | 943.16                  | 0.85              | 0.82                    | 1.16     | 1.12                    |
| 290.26                 | 682.46                  | 824.69   | 1565.59                 | 0.73              | 0.81                    | 2.06     | 1.85                    |
| 269.43                 | 580.54                  | 554.05   | 1176.55                 | 0.67              | 0.69                    | 1.38     | 1.39                    |
| 314.18                 | 679.21                  | 567.12   | 1413.49                 | 0.78              | 0.80                    | 1.42     | 1.67                    |
| 278.55                 | 599.49                  | 440.35   | 860.16                  | 0.70              | 0.71                    | 1.10     | 1.02                    |
| 334.91                 | 761.40                  | 550.83   | 1250.41                 | 0.84              | 0.90                    | 1.38     | 1.48                    |
| 485.43                 | 1019.89                 | 710.16   | 1219.44                 | 1.21              | 1.21                    | 1.77     | 1.44                    |
| 502.30                 | 969.85                  | 511.56   | 1401.14                 | 1.25              | 1.15                    | 1.28     | 1.66                    |
| 528.69                 | 1082.16                 | 474.36   | 926.37                  | 1.32              | 1.28                    | 1.19     | 1.10                    |
| 468.25                 | 1083.75                 | 399.08   | 794.61                  | 1.17              | 1.28                    | 1.00     | 0.94                    |
| 346.66                 | 757.49                  | 528.18   | 982.81                  | 0.87              | 0.90                    | 1.32     | 1.16                    |
| 464.59                 | 1059.78                 | 483.44   | 890.73                  | 1.16              | 1.25                    | 1.21     | 1.05                    |
| 536.95                 | 1254.32                 | 342.40   | 715.88                  | 1.34              | 1.48                    | 0.86     | 0.85                    |
| 630.06                 | 1305.60                 | 466.43   | 966.35                  | 1.57              | 1.54                    | 1.17     | 1.14                    |
| 515.62                 | 1060.34                 | 469.32   | 1072.38                 | 1.29              | 1.25                    | 1.17     | 1.27                    |
| 263.96                 | 683.40                  | 650.60   | 1433.95                 | 0.66              | 0.81                    | 1.63     | 1.70                    |

|        |         |        |         |      |      |      |      |
|--------|---------|--------|---------|------|------|------|------|
| 402.99 | 782.52  | 500.08 | 1050.47 | 1.01 | 0.93 | 1.25 | 1.24 |
| 385.20 | 805.55  | 517.78 | 1081.28 | 0.96 | 0.95 | 1.29 | 1.28 |
| 330.08 | 672.36  | 502.63 | 1136.02 | 0.82 | 0.80 | 1.26 | 1.34 |
| 381.38 | 788.50  | 465.17 | 914.33  | 0.95 | 0.93 | 1.16 | 1.08 |
| 526.38 | 1070.28 | 603.93 | 1457.01 | 1.32 | 1.27 | 1.51 | 1.72 |
| 355.01 | 765.79  | 501.27 | 931.49  | 0.89 | 0.91 | 1.25 | 1.10 |
| 356.95 | 723.36  | 542.02 | 1022.64 | 0.89 | 0.86 | 1.35 | 1.21 |
| 377.01 | 735.95  | 389.53 | 812.22  | 0.94 | 0.87 | 0.97 | 0.96 |
| 418.51 | 830.58  | 456.08 | 956.89  | 1.05 | 0.98 | 1.14 | 1.13 |
| 381.63 | 938.97  | 512.02 | 1056.44 | 0.95 | 1.11 | 1.28 | 1.25 |
| 429.54 | 887.24  | 633.45 | 1072.11 | 1.07 | 1.05 | 1.58 | 1.27 |
| 320.91 | 794.02  | 382.24 | 893.80  | 0.80 | 0.94 | 0.95 | 1.06 |
| 395.34 | 816.00  | 513.17 | 1199.91 | 0.99 | 0.97 | 1.28 | 1.42 |
| 324.84 | 646.26  | 474.56 | 927.67  | 0.81 | 0.76 | 1.19 | 1.10 |
| 250.87 | 511.86  | 561.75 | 1227.65 | 0.63 | 0.61 | 1.40 | 1.45 |
| 393.20 | 760.37  | 380.45 | 793.99  | 0.98 | 0.90 | 0.95 | 0.94 |
| 421.65 | 906.70  | 469.07 | 1093.12 | 1.05 | 1.07 | 1.17 | 1.29 |
| 391.17 | 751.14  | 447.03 | 1140.52 | 0.98 | 0.89 | 1.12 | 1.35 |
| 399.31 | 808.28  | 388.48 | 947.06  | 1.00 | 0.96 | 0.97 | 1.12 |
| 327.47 | 677.23  | 462.10 | 931.77  | 0.82 | 0.80 | 1.15 | 1.10 |
| 392.41 | 744.08  | 512.65 | 933.03  | 0.98 | 0.88 | 1.28 | 1.10 |
| 333.92 | 668.44  | 602.27 | 1059.12 | 0.83 | 0.79 | 1.50 | 1.25 |
| 553.96 | 1012.96 | 506.92 | 1059.75 | 1.38 | 1.20 | 1.27 | 1.25 |
| 354.31 | 908.25  | 668.84 | 1222.30 | 0.89 | 1.07 | 1.67 | 1.45 |
| 553.34 | 1028.11 | 348.32 | 897.92  | 1.38 | 1.22 | 0.87 | 1.06 |
| 497.30 | 986.85  | 728.20 | 1469.19 | 1.24 | 1.17 | 1.82 | 1.74 |
| 465.62 | 876.85  | 518.97 | 1225.51 | 1.16 | 1.04 | 1.30 | 1.45 |
| 426.31 | 859.34  | 496.86 | 1146.53 | 1.07 | 1.02 | 1.24 | 1.36 |
|        |         | 489.83 | 1015.86 |      |      | 1.22 | 1.20 |
| Mean   |         | Mean   |         | Mean |      | Mean |      |
| 400.27 | 845.10  | 520.03 | 1093.17 | 1.00 | 1.00 | 1.30 | 1.29 |

**Table S3. MRPS15 quantification in cytosol with or without mitochondria.**

a) MRPS15 quantification in total cytosolic extract (left panel) or cytosolic extract without mitochondria (right panel) in stressed and unstressed cells was performed using capillary electrophoresis Simple Western (Fig. 3a).

b) MRPS15 immunofluorescence staining in stressed and unstressed cell. Mitochondria were stained using Mitotracker and a mask of mitochondria was done using threshold Otsu from ImageJ and was subtracted from MRPS15 channel to quantify MRPS15 staining. Quantification was performed on 3 independent experiments with at least 50 cells quantified per condition and MRPS15 staining from stressed cells were compared to unstressed cells with a non parametric Mann-Whitney test (Fig. 3b).
